# Supplementary material for: Understanding the influence of the MomConnect programme on antenatal and postnatal care service utilisation in two South African provinces: a realist evaluation protocol
Source: PubMed Central journal article supplement — BMJ Open. 2019 Jul 1;9(7):e029745. doi: 10.1136/bmjopen-2019-029745 (PMC6609052; doi:10.1136/bmjopen-2019-029745), 2019-07-01
Supplement: bmjopen-2019-029745.draft_revisions.pdf [file bmjopen-2019-029745.draft_revisions.pdf]

# BMJ Open

BMJ Open is committed to open peer review. As part of this commitment we make the peer review history of every article we publish publicly available.

When an article is published we post the peer reviewers' comments and the authors' responses online. We also post the versions of the paper that were used during peer review. These are the versions that the peer review comments apply to.

The versions of the paper that follow are the versions that were submitted during the peer review process. They are not the versions of record or the final published versions. They should not be cited or distributed as the published version of this manuscript.

BMJ Open is an open access journal and the full, final, typeset and author-corrected version of record of the manuscript is available on our site with no access controls, subscription charges or pay-per-view fees (<http://bmjopen.bmj.com>).

If you have any questions on BMJ Open's open peer review process please email [info.bmjopen@bmj.com](mailto:info.bmjopen@bmj.com)

# BMJ Open

## Understanding the influence of the MomConnect programme on antenatal and postnatal care service utilisation in two South African Provinces: A Realist Evaluation Protocol

|                               |                                                                                                                                                                                                                                                                                                                                                                                                                   |
|-------------------------------|-------------------------------------------------------------------------------------------------------------------------------------------------------------------------------------------------------------------------------------------------------------------------------------------------------------------------------------------------------------------------------------------------------------------|
| Journal:                      | <i>BMJ Open</i>                                                                                                                                                                                                                                                                                                                                                                                                   |
| Manuscript ID                 | bmjopen-2019-029745                                                                                                                                                                                                                                                                                                                                                                                               |
| Article Type:                 | Protocol                                                                                                                                                                                                                                                                                                                                                                                                          |
| Date Submitted by the Author: | 08-Feb-2019                                                                                                                                                                                                                                                                                                                                                                                                       |
| Complete List of Authors:     | Kabongo, Eveline; Stellenbosch University, Division of Health Systems and Public Health, Mukumbang, Ferdinand; University of the Western Cape, School of Public Health; Ferdinand C. Mukumbang, Nicol, Edward; South African Medical Research Council, Burden of Disease Research Unit, Tygerberg<br>Delobelle, Peter; University of Cape Town, Medicine; University of the Western Cape, School of Public Health |
| Keywords:                     | Quality in health care < HEALTH SERVICES ADMINISTRATION & MANAGEMENT, PRIMARY CARE, PUBLIC HEALTH                                                                                                                                                                                                                                                                                                                 |
|                               |                                                                                                                                                                                                                                                                                                                                                                                                                   |

SCHOLARONE™  
Manuscripts

1  
2 1 **Understanding the influence of the MomConnect programme on antenatal**  
3  
4 2 **and postnatal care service utilisation in two South African Provinces: A**  
5  
6 3 **Realist Evaluation Protocol**  
7  
8 4

9  
10 5 Eveline M. Kabongo<sup>1\*</sup>, Ferdinand C. Mukumbang<sup>2</sup>, Edward Nicol<sup>1,3</sup>, Peter Delobelle<sup>2</sup>  
11  
12 6

13  
14 7 <sup>1</sup> *Division of Health Systems and Public Health, Stellenbosch University, Cape Town, South Africa,*  
15  
16 8

17 8 <sup>2</sup> *School of Public Health, University of the Western Cape, South Africa,*  
18

19 9 <sup>3</sup> *South African Medical Research Council (SA MRC) Cape Town, South Africa*  
20  
21 10

22  
23 11  
24  
25 12 \*Corresponding author  
26

27  
28 13 Ferdinand C. Mukumbang: [mukumbang@gmail.com](mailto:mukumbang@gmail.com)  
29  
30 14

31  
32 15 Eveline M. Kabongo: <https://orcid.org/0000-0002-6651-9097>  
33  
34 16

35 16 Ferdinand C. Mukumbang: <https://orcid.org/0000-0003-1441-2172>  
36

37 17 Edward Nicol: <https://orcid.org/0000-0001-6019-9259>  
38

39 18 Peter Delobelle: <https://orcid.org/0000-0002-9016-7458>  
40  
41 19

42  
43 20  
44  
45 21 **Word count : 3980**  
46  
47 22  
48  
49 23  
50  
51 24  
52  
53 25  
54  
55 26  
56  
57 27  
58  
59  
60

## 28 ABSTRACT

29 **Introduction:** Timely antenatal care (ANC) and postnatal care (PNC) attendance decrease  
30 maternal and child mortality by improving maternal and child health (MCH) outcomes. Mobile  
31 health or mHealth has been identified as an effective way of improving the uptake of MCH  
32 services. The MomConnect is a mHealth initiative launched by the National Department of  
33 Health of South Africa in August 2014 to support MCH. Although widely used in South Africa,  
34 there is a limited understanding of how, why, for whom and under which health system  
35 conditions, the implementation of MomConnect improves the health-seeking behaviours of  
36 pregnant women and mothers of infants in ANC and PNC facilities. This paper describes the  
37 protocol for a realist evaluation of the MomConnect programme.

38 **Method and analysis:** The study will use the realist evaluation approach through its research  
39 cycle conducted in three phases. In phase one, a multi-method elicitation study design will be  
40 used, including document review, key informant interviews and a scoping review to formulate  
41 an initial programme theory of the MomConnect intervention. Content and thematic analytic  
42 approaches will be used to analyse the data that will be fitted into a realist framework to  
43 formulate the initial programme theory. In phase two, a multi-case study design will be applied  
44 using a multimethod approach in two South African provinces. In each case, a theory-testing  
45 approach underpinned by the hypothetico-deduction analytic model will be used to test the  
46 initial programme theory. Surveys, interviews and focus group discussions will be collected  
47 from various programme actors and analysed using appropriate approaches. Phase three will  
48 focus on refining the tested/modified programme theory through cross-case analysis.

49 **Ethics and dissemination:** Ethics approval was granted by the Stellenbosch University ethics  
50 committee (S18/09/189). The protocol has been designed and the study will be conducted in  
51 line with the principles of the Declaration of Helsinki (1964).

## Strengths and limitations of the study

- It provides a blueprint on how our understanding of how and why the MomConnect programme works (or not) within the South African context.
- The proposed study will employ a multi-case study approach applying a mixed-methods approach, which allows for valid theories to be elicited, tested and refined.
- Although cross-case analysis and abstraction allows for theory refining, the cross-case analysis of four or more cases can be very challenging.
- The identification of what constitute a mechanism and context in some cases can be confusing.

**Key words:** mHealth, maternal health services, antenatal care, postnatal care, realist evaluation

## 88 INTRODUCTION

89 In recent decades, there has been greater use of antenatal (ANC) and postnatal care (PNC)  
90 services in South Africa, with higher rates of delivery assisted by professional healthcare  
91 providers.[1] ANC facilitates timely follow-up of pregnant women, to prevent complications  
92 such as premature delivery and pre-eclampsia, as well predict the type of delivery, thereby  
93 reducing pregnancy-related morbidity and mortality.[2–4] Early PNC is important for the  
94 wellbeing of both mothers and new-borns, since it allows clinicians to screen for psychological  
95 and physical changes in the first days following birth.[4] However, despite increasing  
96 utilization in the country as a whole, access to early ANC and PNC services remains limited in  
97 certain provinces.[1]

98 The maternal mortality ratio in South Africa declined from 2014 to 2017, [5] with an  
99 institutional maternal mortality rate (iMMR) of 134/100 000 live births being reported in 2016.  
100 The case fatality rate (CFRs) for excessive bleeding associated with caesarean delivery  
101 (BLDACD) dropped from 33.1 (2011 - 2013) to 31 (2014 - 2016) deaths per 100 000 caesarean  
102 deliveries.[5] In total, almost all (98%) of these cases occurred at tertiary hospitals in the public  
103 sector, where the majority of caesarean deliveries were performed. Most deaths occurred at  
104 provincial tertiary hospitals, attributable to referral from district hospitals after caesarean  
105 delivery with unresolved bleeding.[5] Complications of hypertension in pregnancy and  
106 obstetric haemorrhaging are still major causes of maternal mortality which can be prevented  
107 through early uptake of ANC and PNC services.[5]

108 South Africa is striving to achieve the health outcomes enshrined under the Sustainable  
109 Development Goals (SDGs), which include addressing the challenges faced by maternal and  
110 child health (MCH) service delivery.[4, 6, 7] In keeping with SDG-3 targets, South Africa  
111 developed a strategic plan for MCH to reduce maternal and child mortality by improving the  
112 uptake of ANC and PNC services. The plan included integrating mobile health technology  
113 (mHealth) into the healthcare system as a strategy to overcome barriers to universal health  
114 coverage.[7]

115 The present paper presents a protocol developed for evaluating the MomConnect programme  
116 implemented in South Africa. Towards this end, a realist evaluation is proposed to understand  
117 how, why, for whom and under what health systems conditions the MomConnect intervention  
118 achieves its goal of improving the uptake of MCH services.

119

## 120 **BACKGROUND**

121 mHealth is an element of electronic health (eHealth) used for the provision of healthcare  
122 services using information and communication technology (ICT).[8] mHealth places specific  
123 focus on the use of mobile phone technology based on text messages, regarded as a quick and  
124 cost-effective form of communication.[9] Since mobile phone broadband coverage reaches 69  
125 % of the global population, the growing accessibility of mobile phones has supported the use  
126 of mHealth in public health.[10] Even people living in rural areas in Low and Middle-income  
127 Countries (LMICs) have access to smart phones with internet connectivity [11, 12] and about  
128 eight out of every ten people living in LMICs own a mobile phone.[13] In 2017, South Africa  
129 reached a mobile-cellular subscription rate of 162%.[14]

130 There is interest in the use of mHealth in MCH, since health facilities in LMICs are sometimes  
131 difficult to access due to long distances. The use of mHealth in LMICs may support MCH [12]  
132 by promoting healthier lifestyle habits, enhancing medication adherence, and enforcing regular  
133 attendance of follow-up visits, thereby helping to prevent perinatal complications.[15–17] In  
134 addition, the use of mHealth facilitates improves the communication between health care  
135 service providers and users [18], and promote the uptake of MCH services. Furthermore, a  
136 study by Feroz et al. [17] confirmed the relevance of mHealth initiatives in MCH as a tool for  
137 promoting health education and behavioural change, in turn leading to improved uptake of  
138 MCH services.[17] For example, the “Text4 Baby” intervention in the USA and Russia  
139 examined preparedness among new mothers towards improved MCH.[19] Mothers who  
140 received the Text4 Baby messages were three times more likely to feel ready and prepared to  
141 be a mother compared to the control group.

142 In South Africa, there has been specific interest in the Cell-Life Mobile Alliance for Maternal  
143 Action (MAMA) SMS application as a tool for improving MCH outcomes. This service targets  
144 pregnant women and mothers with babies up to three months’ old and focuses on HIV  
145 prevention as well as the prevention of mother to child transmission of HIV (PMTCT). The use  
146 of this application improved health-seeking behaviour in the target population, and increased  
147 the rates of exclusive breastfeeding, delivery in health facilities, use of skilled birth attendants  
148 for delivery, and adherence to recommended ANC and PNC visits.[20, 21]

### 150 **The MomConnect intervention or initiative**

151 The MomConnect intervention is a prototype for mHealth in South Africa.[22] It was launched  
152 in August 2014 as a National Department of Health (NDoH) initiative, to support MCH through

1  
2 153 the use of mobile phone technology.[23] The ultimate goal of the MomConnect program is to  
3  
4 154 register all pregnant women on a national database and provide users with important health  
5  
6 155 information via a platform for feedback, free of charge.[24]

7  
8 156 By dialling \*120\*550#, on a mobile phone, users subscribe to the MomConnect service and  
9  
10 157 receive messages which encourage them to register at the nearest clinic offering ANC services.  
11  
12 158 Once registered at a clinic, the user gains access to a two-way interactive system through  
13  
14 159 unstructured supplementary service data (USSD)-based surveys and help desk assistance.[25,  
15  
16 160 26] The help desk service is mostly used to obtain information on maternal health rather than  
16  
17 161 discussing the services received at a clinic.[26] Engelhard et al. [27] demonstrated the  
18  
19 162 feasibility and efficacy of the helpdesk in improving quality of care, but also emphasised the  
20  
21 163 need to benchmark its performance and explore opportunities for improvement elsewhere.[27]

22  
23 164 Since its inception, the MomConnect programme has registered about 1.7 million pregnant  
24  
25 165 women at over 95% of public health facilities, suggesting that the programme is meeting its  
26  
27 166 target of identifying and responding to users' needs.[28] An evaluation of the MomConnect  
28  
29 167 programme in 2016 showed that participants reported that the service empowered them to  
30  
31 168 better manage their health during pregnancy as well as that of their babies, and that mothers  
32  
33 169 developed a particular connection with, and trusted the source of the messages.[29]

34  
35 170 MomConnect has seen rapid scaling-up through strong government support and partnerships  
36  
37 171 between key stakeholders. Because of its expanding coverage, MomConnect represents a  
38  
39 172 powerful platform for real-time data collection and linkage to additional services to improve  
40  
41 173 patient care.[30] The MomConnect initiative has contributed to the integration of information  
42  
43 174 systems to support MCH clinical services [31], and represents an important starting point to  
44  
45 175 link other health services and databases.[32] The challenges experienced during the use of the  
46  
47 176 MomConnect intervention in most clinics was related to poor network coverage.[29] The need  
48  
49 177 for improvement in areas such as registration and language has also been highlighted.[29]

50  
51 178 Studies to date have largely focused on the effectiveness of mHealth programmes such as the  
52  
53 179 use of SMS services to remind patients of the timely use of ANC and PNC services and its  
54  
55 180 resultant effect on health seeking behaviour.[17, 29, 33, 34] These studies did not provide  
56  
57 181 consistent results on how the use of mobile phones influences the uptake of ANC and PNC  
58  
59 182 services. For instance, Lefevre et al. [35] showed the importance of the MomConnect  
60  
183 programme in MCH, but contextual factors such as why some women used the services more  
184  
185 184 than others were not explored. In addition, the mechanisms through which the use of mobile  
phones influences health seeking behaviour have not been clearly explained. Towards this end,



186 a realist evaluation is proposed to understand how, why, for whom and under what health  
 187 systems conditions the MomConnect intervention achieves its goal of improving the uptake of  
 188 MCH services.

## 190 Study setting

191 The study will be conducted in the Gauteng (GT) and Free State (FS) provinces of South Africa  
 192 (Figure 1). These provinces were selected based on the highest (GT) and lowest (FS) rates of  
 193 MomConnect registration from September 2014 to June 2017. GT accounted for 299,417  
 194 (22.2%) and FS for 64,416 (4.8%) of the total number of national registrations of 1,337,889  
 195 for this period.[35] The GT and FS provinces differ from each other in terms of socio-economic  
 196 and demographic characteristics of their inhabitants.[1] The use of mobile phones in GT and  
 197 FS as at 2016 were 98.2% and 94.9% respectively.[36] Table 1 presents information on  
 198 socioeconomic and demographics characteristics of the populations living in GT and FS.  
 199 Western Rand and Johannesburg city districts were identified as study settings located in the  
 200 best resourced province (GT), while in FS (less resourced province) two districts, Xhariep and  
 201 Fezile Dabi were selected. Xhariep is the largest district in FS, has an economic quintile of  
 202 three, and is among the best resourced' districts in provinces.

203 **Table 1 Socioeconomic and demographic factors**

|                         | <b>Gauteng</b>                                                                                                                                                                                                                                                       | <b>Free state</b>                                                                  |
|-------------------------|----------------------------------------------------------------------------------------------------------------------------------------------------------------------------------------------------------------------------------------------------------------------|------------------------------------------------------------------------------------|
|                         | <i>1. Western Rand district</i>                                                                                                                                                                                                                                      | <i>1. Xhariep district</i>                                                         |
| Population              | 884 031                                                                                                                                                                                                                                                              | 135,036                                                                            |
| Sub-districts           | Sub-districts:4<br>1. <b>Randfontein</b><br>2. Westonaria<br>3. Merafong City<br>4. Mogale City                                                                                                                                                                      | Sub-districts:4<br>1. Kopanong<br>2. <b>Naledi</b><br>3. Mohokare<br>4. Letsemeng  |
| Houses headed by female | 31.75%                                                                                                                                                                                                                                                               | 37.6%                                                                              |
| formal dwelling         | 76.3%                                                                                                                                                                                                                                                                | 89.1%                                                                              |
| Unemployment rate       | 26.3%                                                                                                                                                                                                                                                                | 26.8%                                                                              |
|                         | <i>2. Johannesburg city district</i>                                                                                                                                                                                                                                 | <i>2. Fezile Dabi district</i>                                                     |
| Population              | 5,006,517                                                                                                                                                                                                                                                            | 507,525                                                                            |
| Sub-districts           | Sub-districts:7<br>1. <b>Johannesburg Sub-district A</b><br>2. Johannesburg Sub-district B<br>3. Johannesburg Sub-district C<br>4. Johannesburg Sub-district D<br>5. Johannesburg Sub-district E<br>6. Johannesburg Sub-district F<br>7. Johannesburg Sub-district J | Sub-districts: 4<br>1. Mafube<br>2. <b>Moqhaka</b><br>3. Ngwathe<br>4. Metsimaholo |

|                         |       |       |
|-------------------------|-------|-------|
| Houses headed by female | 37.7% | 37.5% |
| Formal dwelling         | 81.3% | 85.6% |
| Unemployment rate       | 61.5% | 33.9% |

204 **Sources:** DHB 1016/1017

205 In terms of MCH indicators, the district health barometer (DHB) 2016/2017 reported 71.2% of  
 206 PNC visits within six days in GT, which is lower than the national target of 75% and FS  
 207 (85.9%). ANC first visits before 20 weeks was 58.4% less than the national target of 62.1 in  
 208 GT while FS had 65.8% of ANC first visits in the same period.[1]

209 *Figure 1: Map of South Africa and study settings (Setting 1: Gauteng and Setting 2: Free State)*

## 211 **Methods**

212 The study will be guided by a realist evaluation approach, which was introduced through the  
 213 seminal work of Pawson and Tilley [37] to address the question: ‘What works, for whom, why,  
 214 in what situation, and how?’ with regards to intervention, programmes and policies. The  
 215 philosophical ontology of realist evaluation is realism and its epistemological foundation lies  
 216 in scientific realism.[37] Realist evaluation belongs to the family of theory-driven approaches  
 217 of evaluation. In this light, the approach aims to develop and refine hypotheses of generative  
 218 causality explicating why and how intervention inputs bring about changes in key  
 219 outcomes.[38] The proposed study will be developed following three different phases, as  
 220 described in Figure 2 and reported following the guidelines for reporting realist evaluation  
 221 studies.[38]

222 *Figure 2: Study design showing Phases 1 to 3 adapted from [39, 40] (source: study author).*

### 224 **Phase 1: Gleaning the initial programme theory**

225 Phase 1 will address the first objective of the study, namely, to formulate the initial programme  
 226 theory (IPT) of how the MomConnect programme was expected to work for different actors  
 227 (designers, health workers and MCH clients). A multi-method elicitation study will be  
 228 conducted using data collected from the following sources: document review, key informant  
 229 interviews and a scoping review [41]:

- 230 - Document review will explore documents such as the action plan, staff meeting reports  
 231 and other minutes; any literature on MomConnect; and the national monitoring as well  
 232 as evaluation report. Permission will be requested from the MomConnect monitoring

1  
2 233 and evaluation team to access these documents and explore how MomConnect was  
3  
4 234 developed, who participated and with what intended objectives.

- 5 235 - In-depth interviews (IDI) with 5-10 key informants, including programme designers  
6  
7 236 (those who assisted in program conceptualisation) and managers (those who assisted in  
8  
9 237 programme implementation and coordination) will be conducted to explore their  
10  
11 238 expectations on how MomConnect was supposed to work. Key informants will be  
12  
13 239 selected using convenient sampling and a face-to-face interview organised using an  
14  
15 240 interview guide with exploratory questions. The in-depth interviews with key  
16  
17 241 informants will be audio-recorded and transcribed verbatim  
18  
19 242 - The scoping review of research conducted on mHealth and MCH will be performed by  
20  
21 243 searching the following databases: Academic research complete, Medline, Pubmed,  
22  
23 244 Scopus, Health System Evidence and Google scholar.

24 245 Document analysis [42] as a methodological process for review and evaluation will be used to  
25  
26 246 examine and interpret MomConnect documents, including capturing the meaning, gaining  
27  
28 247 understanding, and developing empirical knowledge on how the intervention was developed  
29  
30 248 and implemented.[42] The Intervention-Context-Actors-Mechanism-Outcomes (ICAMO)  
31  
32 249 heuristic tool will be used to guide a content analysis approach.

33 250 An exploratory qualitative analysis of programme managers and designers' assumptions and  
34  
35 251 perspectives will be undertaken. The in-depth interviews with key informants will be audio-  
36  
37 252 recorded and transcribed verbatim. Summary sheets and field notes will be written up for each  
38  
39 253 interview at the end of the day. Thematic analysis based on the generic inductive approach [43]  
40  
41 254 will be conducted using Atlas.ti software version 8.0. For the scoping review a thematic  
42  
43 255 analysis [44] will be used to explore the possible generative mechanisms reported in other  
44  
45 256 studies conducted on mHealth interventions and MCH. The ICAMO framework will be used  
46  
47 257 to retrieve the information.

48 258 A configurational mapping approach [45] guided by the ICAMO heuristic tool will be used to  
49  
50 259 synthesise the information gleaned from document review, key informant and scoping review,  
51  
52 260 to formulate the (IPT) that will be tested in phase two.[45] The theory formulated will be  
53  
54 261 informed by various forms of inference making: deductive, inductive, and retroductive  
55  
56 262 reasoning.

57 263

58 264

59 265

## 266 Phase 2: Testing the initial programme theory

267 The initial programme theory formulated in phase I will be tested in the selected cases using a  
 268 multi-method study design. Quantitative assessment will be performed using a cross-sectional  
 269 design, whereby a survey will be used to explore how socio-economic characteristic influence  
 270 the uptake of MCH and determine for whom the intervention works. In contrast, qualitative  
 271 approaches will focus on determining the mechanism by which the outcomes are generated. To  
 272 assess the reliability of data collection, a pilot study will be conducted in two healthcare  
 273 facilities selected for convenience in the sub-district with the highest and lowest rates of ANC  
 274 first visits before 20 weeks in GT and FS, respectively. The pilot will include health care  
 275 providers (HCP), pregnant women and mothers.

### 277 Sampling and data collection

278 OpenEpi software and MS Excel will be used to randomly select four facilities in each sub-  
 279 district (see Table 3). The sample size in each facility will be calculated [46], assuming 50%  
 280 prevalence of MCH services agreement per facility, a precision (d) of 0.10 and a 95%  
 281 confidence interval. The monthly estimated number of MCH visits for each facility and the  
 282 proportion of ANC first visits before 20 weeks will be used to calculate the sample size using  
 283 an online calculator (Table 3).[46] In cases where the ratio of the sample size (n) to the  
 284 population size (N) is greater than 5%, finite population correction (FPC) will be used.[47] The  
 285 number of users found in all four facilities will be multiplied by a design effect (DE) of 1.5 to  
 286 get the total number of participants (Table 3).

288 **Table 2** Selected sample by districts, sub-districts, facilities and participants

| District             | Gauteng<br>(District with highest rate)               | Gauteng<br>(District with lowest rate)                | Free State<br>(District with highest rate)                | Free Sate<br>(District with lowest rate)                      |
|----------------------|-------------------------------------------------------|-------------------------------------------------------|-----------------------------------------------------------|---------------------------------------------------------------|
| Sub-District         | Randfontein sub-district (8 facilities)               | Johannesburg A (14 facilities)                        | Naledi (4 facilities)                                     | Moqhaka (9 facilities)                                        |
| Facility             | Kocksoord Clinic<br>ANC 1 visit < 20 weeks<br>= 82.0% | Mayibuye Clinic<br>ANC 1 visit, < 20 weeks<br>= 49.0% | Vanstadensrus Clinic<br>ANC 1 visit < 20 weeks<br>= 75.0% | Thusanong (Kroon) clinic<br>ANC 1 visit < 20 weeks<br>= 69.0% |
| Sample per facility* | Number of participants =<br>53 x 1.5 = 80             | Number of participants =<br>85 x 1.5 = 127            | Number of participants =<br>66 x 1.5 = 99                 | Number of participants =<br>74 x 1.5 = 111                    |

289 \*Estimated number of participants (based on proportional sampling)

290 The study participants will include all pregnant women and mothers of infants registered under  
 291 the MomConnect programme, who are 18 years of age or older, irrespective of parity (including

1  
2 292 stillbirths/miscarriages), and socio-economic status. They will be identified through the  
3  
4 293 MomConnect registration registers at facility level. Health care providers (HCP) services will  
5  
6 294 include clinical staff in charge of ANC and PNC at facility level and will be selected based on  
7  
8 295 their prior experience with the MomConnect programme.

9  
10 296 For administration of the study questionnaire, an appointment will be made with each  
11  
12 297 participant, using the contact details captured in the MomConnect database, to invite them to  
13  
14 298 the facility to participate in the study. The survey tools will also be administered telephonically  
15  
16 299 to those participants who are unable to visit the facility during the study period. Furthermore,  
17  
18 300 a facility assessment questionnaire will be administered to HCPs to explore the structural and  
19  
20 301 contextual attributes that may influence the uptake of ANC and PNC services.

21  
22 302 Qualitative assessments will include in-depth interviews and focus group discussion (FGDs).  
23  
24 303 An estimated 10 to 20 in-depth interviews will be conducted with HCPs at facility level to  
25  
26 304 explore their perceptions (resources, implementation processes and programme uptake) of the  
27  
28 305 MomConnect programme. Four FGD (one per facility) consisting of between 10 and 15  
29  
30 306 participants will be conducted to ascertain their perceptions regarding the uptake of ANC  
31  
32 307 services and expectations of the MomConnect programme. IDIs and FGDs will be audio-  
33  
34 308 recorded and transcribed verbatim. The interview guide and survey questionnaire are designed  
35  
36 309 in English but will be translated into the local language used in the different study settings  
37  
38 310 (Afrikaans, Setswana, Sesotho, Zulu, Xhosa) and back-translated in English. Data gathered  
39  
40 311 from the above sources will be translated and transcribed in preparation for analysis.

41  
42 312 In each case, a theory refining research approach underpinned by the hypothetico-deduction  
43  
44 313 analytic model will be used.[40, 48]

45  
46 314

#### 47 315 **Data analysis**

48  
49 316 Inferential and descriptive analyses of the quantitative data including proportions and  
50  
51 317 frequencies will be performed using Stata version 15. Socio-economic and demographic data  
52  
53 318 will be used as independent variables while the uptake of MCH will be used as the dependent  
54  
55 319 variable, which will allow us to determine for whom the intervention works. For bivariate  
56  
57 320 analysis, categorical data will be analysed using Chi-squared test. Logistic regression models  
58  
59 321 will be constructed to assess the effects of independent variables as predictors of dependent  
60  
322 outcomes of interest. The power of each dependent variable will be tested before the variable  
323 is include in the model and only the variable with positive outcomes will be maintained. A p-  
324 value of <0.05 will be used to indicate statistical significance along with a 95% corresponding  
325 confidence interval (CI).

1  
2 326 For qualitative data, IDI and FGDs will be analysed separately using a thematic content  
3  
4 327 analysis approach to identify and make explicit the mechanism by which observed outcomes  
5  
6 328 are generated using the ICAMO framework. FGDs and IDI transcripts will be uploaded onto  
7  
8 329 Atlas.ti 8.0 for analysis and will follow five steps: 1) development of a coding framework, 2)  
9  
10 330 testing code reliability, 3) identifying initial themes emerging from the data, 4) using the code  
11  
12 331 manual to apply codes to the entire script, and 5) connecting codes into themes through an  
13  
14 332 interpretation process.

### 15 333 **Modifying the programme theory**

16 334 In-case analysis [37] will be conducted using retroductive reasoning [49] to modify the ICAMO  
17  
18 335 elements through configuration mapping based on the data obtained from each case to modify  
19  
20 336 the initial programme theory. In other words, ICAMO configurations will be modified into  
21  
22 337 case-based programme theories (for each of the four facilities). Each case-based modified  
23  
24 338 theory will be tested to check their explanatory power through the process of counterfactual  
25  
26 339 thinking towards a functional theory.[50] ICAMO matrices will be used to present data for  
27  
28 340 each higher-level outcome of concern.

29 341

### 30 342 **Phase 3: Refining the modified programme theory**

31 343 A refined programme theory is a clear explanatory theory that can be used to give details of  
32  
33 344 programme elements. In this phase the analysis will be realised through five means:

- 34 345
- 35 346 a) A cross case analysis of the four case studies will be conducted following retroductive  
36 347 reasoning to construct ICAMO matrices (ICAMO configuration obtained from each of  
37 348 the four case studies) across the cases to obtain a refined programme theory.
  - 38 349 b) A counterfactual and trans-factual thinking process [50] will be carried out to compare  
39 350 the conjectured ICAMO from the cases with the initial programme theory, and their  
40 351 explanatory power across the cases examined.
  - 41 352 c) For each generative mechanism linked to a positive outcome in one case, other cases  
42 353 with the same outcome will be assessed to identify additional components. Similarly,  
43 354 ICAMOs associated with failed outcomes will be categorized together.
  - 44 355 d) A systems thinking approach [51] will be applied using a cross-case analysis to allow  
45 356 critical reflection of how the intervention works.
  - 46 357 e) The original transcripts will be referred to, in order to check for consistency of the final  
47 358 ICAMO and will be validated through FGD with relevant stakeholders.



## 359 **Quality control**

360 Quality control and credibility will be assured through data familiarisation by all the  
361 investigators and corresponding discussion.

## 363 **Ethics and dissemination**

364 Ethics approval has been granted by the Health Research Ethics Committee (HREC) of the  
365 Stellenbosch University (Ref No: S18/09/189). An approval to conduct the study in the selected  
366 facilities is currently being processed by the relevant provincial Department of Health. Consent  
367 forms will be used to obtain permission from study participants before data collection. Personal  
368 information will be protected by not disclosing names during data analysis or reporting.  
369 Different papers will be published from the study, and the results will be presented in academic  
370 open day, national and international conferences.

## 372 **DISCUSSION**

373 Despite the relevance of mHealth in improving MCH being increasingly recognised [52], an  
374 empirical investigation to understand how the outcomes are generated is still lacking. This  
375 protocol specifies the research plan to investigate how and why the MomConnect programme  
376 works or achieves its goal of improving MCH services in South Africa. Study investigators  
377 will also seek to understand MomConnect as part of an mHealth programme that uses mobile  
378 phone by focusing on how the contextual factors affects the use of MCH services.

379 The proposed study draws on a theory-driven evaluation (TDE) approach, which describes a  
380 process under which components are hypothesised to affect outcomes, and considers the  
381 specific conditions under which such processes operate.[39] TDE is commonly used in the  
382 social sciences to investigate how programmes cause intended or observed outcomes [53], as  
383 well as address issues around internal and external validity, which is of potential relevance to  
384 both researchers and policymakers.[39, 54, 55] The proposed study will use a realist evaluation  
385 approach, which is a type of TDE.[38] Pawson and Tilley [37] developed the realist evaluation  
386 to address the question: What works, for whom, why, in what situation and how?. TDE will be  
387 used in this study to access in particular how the use of mobile phones influences the uptake of  
388 MCH services.

389 The protocol is an important quality tool as it allows for follow-up by anticipating the  
390 challenges and barriers that may occur during the study.[56, 57] This study protocol also assists  
391 in thinking through how to generate the internal consistency and external validity of results and

1  
2 392 to explain how the interventions works in a given context to produce the observed outcome.  
3  
4 393 The lack of such protocol can lead to some issues, such as lack of explanation of the change  
5  
6 394 at or between individual, institutional or contextual levels because these was not documented  
7  
8 395 from the start.[58] Moreover, writing a detailed research protocol is important in helping other  
9  
10 396 researchers to replicate relevant study findings for contribution towards the broader research  
11  
12 397 community. Constructing a comprehensive protocol including clear aims, rationale, analysis  
13  
14 398 plans and expectations lends additional credibility to research across study fields.[58]

### 399 **Acknowledgments**

400 Not applicable

401

### 402 **Contributors**

403 The study was conceived by EMK and PD. The first manuscript was written by EMK. FCM and  
404 EN provided methodological support. FCM, PD, EN provided critical conceptualisation and  
405 contribution towards developing and refining the manuscript. All authors read and approved the  
406 final manuscript.

407

### 408 **Competing interest:**

409 None declared

410

### 411 **Funding**

412 None declared

413

414

### 415 **Ethics approval**

416 Stellenbosch University Human research ethics committee (Ref No S18/09/189).

417

### 418 **References**

- 419 [1] Massyn N, Padarath A, Peer N, et al. *District Health Barometer*. 2017.
- 420 [2] Symon A, Pringle J, Cheyne H, et al. Midwifery-led antenatal care models : mapping a  
421 systematic review to an evidence-based quality framework to identify key components and  
422 characteristics of care. *BMC Pregnancy Childbirth* 2016; 16: 168.



- 1  
2 423 [3] Ram F, Singh A. Is antenatal care effective in improving maternal health in rural Uttar  
3 424 Pradesh? Evidence from a district level household survey. *J.biosocSci* 2006; 38: 433–448.  
4  
5 425 [4] Massyn N, Peer N, Padarath A, et al. *District Health Barometer*. 2016.  
6  
7  
8 426 [5] Moodley J, Chb MB, Fawcus S, et al. Improvements in maternal mortality in South Africa.  
9 427 *SAML Res* 2018; 108: 4–8.  
10  
11 428 [6] Sachs JD. From millennium development goals to sustainable development goals. *Lancet*  
12 429 (*London, England*) 2012; 379: 2206–11.  
13  
14  
15 430 [7] Le Blanc D. Towards Integration at Last? The Sustainable Development Goals as a Network  
16 431 of Targets. *Sustain Dev* 2015; 23: 176–187.  
17  
18  
19 432 [8] Aranda-Jan CB, Mohutsiwa-Dibe N, Loukanova S. Systematic review on what works, what  
20 433 does not work and why of implementation of mobile health (mHealth) projects in Africa. *BMC*  
21 434 *Public Health* 2014; 14: 188–203.  
22  
23  
24 435 [9] Kaplan W. Can the Ubiquitous power of mobile phones be used to improve health outcomes in  
25 436 developing countries? *Global Health* 2006; 14.  
26  
27  
28 437 [10] SANOU B. ICT Facts & Figures. The world in 2015. *Itu 150 Años (1865 - 2015)* 2015; 1–6.  
29  
30  
31 438 [11] Premji S. Mobile health in maternal and newborn care: Fuzzy logic. *International Journal of*  
32 439 *Environmental Research and Public Health* 2014; 6494–6503.  
33  
34  
35 440 [12] Oyeyemi SO, Wynn R. The use of cell phones and radio communication systems to reduce  
36 441 delays in getting help for pregnant women in low- and middle-income countries: a scoping  
37 442 review. *Glob Health Action* 2015; 8: 28887–28895.  
38  
39  
40 443 [13] World Bank. World Development Report 2016: Digital Dividends,  
41 444 <http://www.worldbank.org/en/publication/wdr2016> (2016, accessed 25 January 2018).  
42  
43  
44 445 [14] Services P. South Africa Profile ( Latest data available : 2017 ). 2017; 1–3.  
45  
46 446 [15] Watterson JL, Walsh J, Madeka I. Using mHealth to Improve Usage of Antenatal Care,  
47 447 Postnatal Care, and Immunization: A Systematic Review of the Literature. *BioMed Research*  
48 448 *International*. Epub ahead of print 2015. DOI: 10.1155/2015/153402.  
49  
50  
51 449 [16] Poorman E, Gazmararian J, Parker RM, et al. Use of Text Messaging for Maternal and Infant  
52 450 Health: A Systematic Review of the Literature. *Matern Child Heal* 2015; 19: 969–989.  
53  
54  
55 451 [17] Feroz A, Perveen S, Aftab W. Role of mHealth applications for improving antenatal and  
56 452 postnatal care in low and middle income countries: A systematic review. *BMC Health Serv*  
57 453 *Res* 2017; 17: 1–12.  
58  
59  
60 454 [18] Wambugu S, Villella C. mHealth for Health Information Systems in Low- and Middle-Income

- 1  
2 455 Countries: Challenges and Opportunities in Data Quality, Privacy, and Security. 2016; 1–19.  
3  
4 456 [19] Parker RM, Dmitrieva E, Frolov S, et al. Text4baby in the United States and Russia: An  
5  
6 457 Opportunity for Understanding How mHealth Affects Maternal and Child Health. *J Health*  
7  
8 458 *Commun* 2012; 17: 30–36.
- 9  
10 459 [20] USAIDS. Mobile Alliance for Maternal Action (MAMA). *mHealth knowledge*,  
11  
12 460 <http://www.mhealthknowledge.org/search/site/MAMA> (2015).
- 13  
14 461 [21] Ausen-anifrani S, Burman MK, Pastick K. SMS Maama. *United Nation Found* 2016; 1–14.
- 15  
16 462 [22] Peter JE, Barron P, Pillay Y. Using mobile technology to improve maternal, child and youth  
17  
18 463 health and treatment of HIV patients. *South African Med J* 2016; 106: 3.
- 19  
20 464 [23] Seebregts C, Dane P, Parsons AN, et al. Designing for scale : optimising the health  
21  
22 465 information system architecture for mobile maternal health messaging in South Africa (  
23  
24 466 MomConnect ). *BMJ Glob* 2018; 2: 1–7.
- 25  
26 467 [24] Mehl GL, Tamrat T, Bhardwaj S, et al. Digital health vision : could MomConnect provide a  
27  
28 468 pragmatic starting point for achieving universal health coverage in South Africa and  
29  
30 469 elsewhere ? *BMJ Glob Heal* 2018; 3: 1–5.
- 31  
32 470 [25] Barron P, Peter J, Lefevre AE, et al. Mobile health messaging service and helpdesk for South  
33  
34 471 African mothers ( MomConnect ): history , successes and challenges. *BMJ Glob Heal* 2018; 3:  
35  
36 472 1–6.
- 37  
38 473 [26] Xiong K, Kamunyor J, Sebidi J. The MomConnect helpdesk : how an interactive mobile  
39  
40 474 messaging programme is used by mothers in South Africa. *BMJ Glob Heal* 2018; 3: 000578.
- 41  
42 475 [27] Engelhard M, Copley C, Watson J, et al. Optimising mHealth helpdesk responsiveness in  
43  
44 476 South Africa : towards automated message triage. *BMJ Glob Heal* 2018; 3: 1–9.
- 45  
46 477 [28] Pillay Y, Motsoaledi PA. Digital health in South Africa : innovating to improve health. *BMJ*  
47  
48 478 *Glob Heal* 2018; 4–6.
- 49  
50 479 [29] Skinner D, Delobelle P, Pappin M, et al. User assessments and the use of information from  
51  
52 480 MomConnect , a mobile phone text-based information service , by pregnant women and new  
53  
54 481 mothers in South Africa. *BMJ Glob Heal* 2018; 3: 1–6.
- 55  
56 482 [30] Barron P, Peter J, Lefevre AE, et al. Mobile health messaging service and helpdesk for South  
57  
58 483 African mothers ( MomConnect ): history , successes and challenges. *BMJ Glob Heal* 2018; 3:  
59  
60 484 000559-6.
- 485 [31] Heekes A, Tiffin N, Dane P, et al. Self-enrolment antenatal health promotion data as an  
486 adjunct to maternal clinical information systems in the Western Cape Province of South

- 1  
2 487 Africa. 2018; 1–9.  
3
- 4 488 [32] Peter J, Benjamin P, Lefevre AE, et al. Taking digital health innovation to scale in South  
5 Africa : ten lessons from MomConnect. *BMJ Glob Heal* 2018; 3: 1–4.  
6 489
- 7  
8 490 [33] Free C, Phillips G, Watson L, et al. The Effectiveness of Mobile-Health Technologies to  
9 Improve Health Care Service Delivery Processes: A Systematic Review and Meta-Analysis.  
10 491 *PLoS Med*. Epub ahead of print 2013. DOI: 10.1371/journal.pmed.1001363.  
11 492
- 12  
13 493 [34] Agarwal S, Perry HB, Long L-A, et al. Evidence on feasibility and effective use of mHealth  
14 strategies by frontline health workers in developing countries: systematic review. *Trop Med Int*  
15 494 *Heal* 2015; 20: 1003–1014.  
16 495
- 17  
18 496 [35] Lefevre AE, Dane P, Copley CJ, et al. Unpacking the performance of a mobile health  
19 information messaging program for mothers ( MomConnect ) in South Africa : evidence on  
20 497 program reach and messaging exposure. *BMJ Glob Heal* 2018; 3: 1–12.  
21 498
- 22  
23 499 [36] Statistics South Africa c. *General Household Survey 2016*. 2018.  
24
- 25  
26 500 [37] Pawson R, Tilley N. *Realistic evaluation*. Sage, 1997.  
27
- 28  
29 501 [38] Wong G, Westhorp G, Manzano A, et al. RAMESES II reporting standards for realist  
30 502 evaluations. *BMC Med* 2016; 14: 96–114.
- 31  
32 503 [39] Van Belle SB, Marchal B, Dubourg D, et al. How to develop a theory-driven evaluation  
33 design? Lessons learned from an adolescent sexual and reproductive health programme in  
34 504 West Africa. *BMC Public Health* 2010; 10: 141–151.  
35 505
- 36  
37 506 [40] Mukumbang FC, Marchal B, Belle S Van, et al. Unearthing how, why, for whom and under  
38 what health system conditions the antiretroviral treatment adherence club intervention in South  
39 507 Africa works: A realist theory refining approach. *BMJ Glob* 2018; 18: 1–15.  
40 508
- 41  
42 509 [41] Æ DSD, Hausenblas HA. Elicitation studies and the theory of planned behavior : a systematic  
43 review of exercise beliefs. *Psychology Sport Exerc* 2005; 6: 1–31.  
44 510
- 45  
46 511 [42] Bowen GA. Document analysis as a qualitative research method. *Qualitative Res J* 2009; 9:  
47 512 27–40.
- 48  
49 513 [43] Thomas DR. A General Inductive Approach for Analyzing Qualitative Evaluation Data. *Am J*  
50 *Eval* 2006; 27: 237–246.  
51 514
- 52  
53 515 [44] Ritchie J, Spencer L. Qualitative Data Analysis for Applied Policy Research. *The qualitative*  
54 *researcher's companion* 2002; 305–329.  
55 516
- 56  
57 517 [45] Mukumbang FC, Marchal B, Belle S Van, et al. A realist approach to eliciting the initial  
58 programme theory of the antiretroviral treatment adherence club intervention in the Western  
59 518

- 1  
2 519 Cape Province , South Africa. 2018; 1–16.  
3
- 4 520 [46] Naing L, Winn T, Rusli BN. Practical Issues in Calculating the Sample Size for Prevalence  
5 521 Studies. *Arch Orofac Sci* 2006; 1: 9–14.  
6  
7
- 8 522 [47] Burstein H. Finite Population Correction for Binomial Confidence Limits. *Taylor Fr Gr* 1975;  
9 523 70: 67–69.  
10
- 11 524 [48] Eastwood JG, Jalaludin BB, Kemp LA. Realist explanatory theory building method for social  
12 525 epidemiology : a protocol for a mixed method multilevel study of neighbourhood context and  
13 526 postnatal depression. *Springer Plus* 2014; 3: 1–12.  
14
- 15 527 [49] Zoltan D. Plenary Speech Researching complex dynamic systems : ‘ Retrodictive qualitative  
16 528 modelling ’ in the language classroom. *Cambridge Univ Pree* 2011; 47: 80–91.  
17
- 18 529 [50] Roese NJ. Counterfactual Thinking. *Am Psychol Assoc* 1997; 121: 133–148.  
19
- 20 530 [51] Savigny, Don de and Adam T. *Systems Thinking for Health Systems Strengthening - World  
21 531 Health Organization - Google Books,*  
22 532 [https://books.google.co.za/books?hl=en&lr=&id=dyydaVwf4WkC&oi=fnd&pg=PA7&dq=Savigny+and+Adam,+2009+system+thinking&ots=MaLpjjj9Z4&sig=7yHxOE5mtDT\\_3eiLQ54BkiIMm9U#v=onepage&q=Savigny+and+Adam%2C+2009+system+thinking&f=false](https://books.google.co.za/books?hl=en&lr=&id=dyydaVwf4WkC&oi=fnd&pg=PA7&dq=Savigny+and+Adam,+2009+system+thinking&ots=MaLpjjj9Z4&sig=7yHxOE5mtDT_3eiLQ54BkiIMm9U#v=onepage&q=Savigny+and+Adam%2C+2009+system+thinking&f=false) (2009,  
23 533 accessed 7 August 2017).  
24 534  
25 535
- 26 536 [52] Lee H.S., ulugbek B. N., Bright I N, Mome M, ILiz Grant CP. H8. *Glob Heal* 2016; 6: 1–17.  
27
- 28 537 [53] Coryn CLS, Noakes LA, Westine CD, et al. A systematic review of theory-driven evaluation  
29 538 practice from 1990 to 2009. *Am J Eval* 2011; 32: 199–226.  
30
- 31 539 [54] Chen HT. The conceptual framework of the theory-driven perspective. *Eval Program Plann*  
32 540 1989; 12: 391–396.  
33
- 34 541 [55] Chen H-T, Rossi H. Issues in the Theory-Driven. *Eval Progr Planning, Vol* 1989; 12: 299–  
35 542 306.  
36
- 37 543 [56] Chen L, Wang W, Du X, et al. Effectiveness of a smart phone app on improving immunization  
38 544 of children in rural Sichuan Province, China: study protocol for a paired cluster randomized  
39 545 controlled trial. *BMC Public Health*; 14. Epub ahead of print 2014. DOI: 10.1186/1471-2458-  
40 546 14-262.  
41
- 42 547 [57] Mukumbang FC, Van Belle S, Marchal B, et al. Realist evaluation of the antiretroviral  
43 548 treatment adherence club programme in selected primary healthcare facilities in the  
44 549 metropolitan area of Western Cape Province, South Africa: a study protocol. *BMJ Open* 2016;  
45 550 6: e009977-88.  
46  
47  
48  
49  
50  
51  
52  
53  
54  
55  
56  
57  
58  
59  
60

1  
2  
3  
4  
5  
6  
7  
8  
9  
10  
11  
12  
13  
14  
15  
16  
17  
18  
19  
20  
21  
22  
23  
24  
25  
26  
27  
28  
29  
30  
31  
32  
33  
34  
35  
36  
37  
38  
39  
40  
41  
42  
43  
44  
45  
46  
47  
48  
49  
50  
51  
52  
53  
54  
55  
56  
57  
58  
59  
60

551 [58] Prashanth NS, Marchal B, Hoeree T, et al. How does capacity building of health managers  
552 work? A realist evaluation study protocol. DOI: 10.1136/bmjopen-2012-000882.

553

For peer review only

1  
2  
3  
4  
5  
6  
7  
8  
9  
10  
11  
12  
13  
14  
15  
16  
17  
18  
19  
20  
21  
22  
23  
24  
25  
26  
27  
28  
29  
30  
31  
32  
33  
34  
35  
36  
37  
38  
39  
40  
41  
42  
43  
44  
45  
46  
47  
48  
49  
50  
51  
52  
53  
54  
55  
56  
57  
58  
59  
60

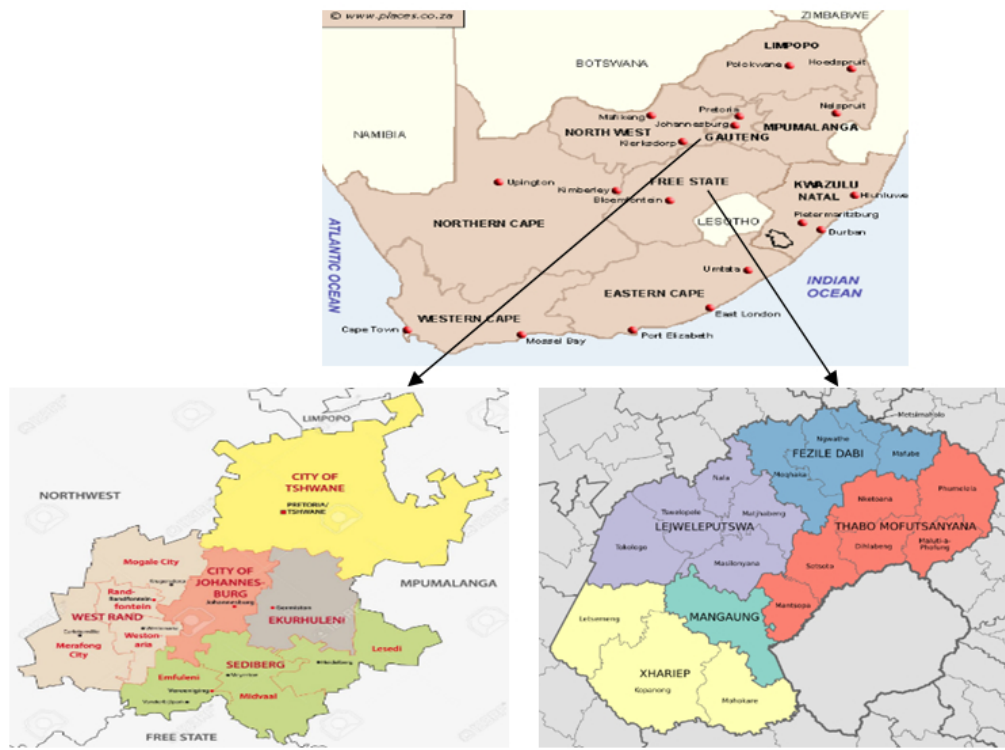

Figure 1: Map of South Africa and study settings

194x145mm (96 x 96 DPI)

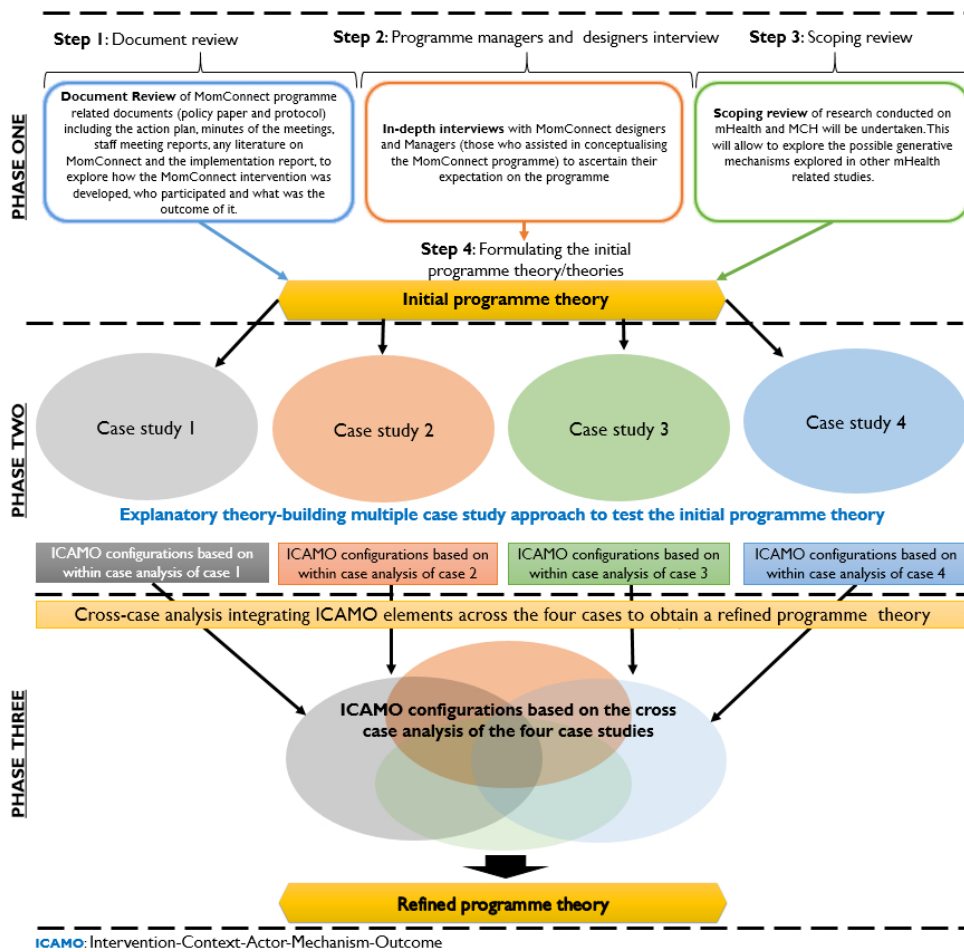

Figure 2: Study design showing Phases 1 to 3

237x225mm (96 x 96 DPI)

# BMJ Open

## Understanding the influence of the MomConnect programme on antenatal and postnatal care service utilisation in two South African Provinces: A Realist Evaluation Protocol

|                                 |                                                                                                                                                                                                                                                                                                                                                                                                                |
|---------------------------------|----------------------------------------------------------------------------------------------------------------------------------------------------------------------------------------------------------------------------------------------------------------------------------------------------------------------------------------------------------------------------------------------------------------|
| Journal:                        | <i>BMJ Open</i>                                                                                                                                                                                                                                                                                                                                                                                                |
| Manuscript ID                   | bmjopen-2019-029745.R1                                                                                                                                                                                                                                                                                                                                                                                         |
| Article Type:                   | Protocol                                                                                                                                                                                                                                                                                                                                                                                                       |
| Date Submitted by the Author:   | 10-May-2019                                                                                                                                                                                                                                                                                                                                                                                                    |
| Complete List of Authors:       | Kabongo, Eveline; Stellenbosch University, Division of Health Systems and Public Health, Mukumbang, Ferdinand; University of the Western Cape, School of Public Health; Ferdinand C. Mukumbang, Delobelle, Peter; University of Cape Town, Medicine; University of the Western Cape, School of Public Health Nicol, Edward; South African Medical Research Council, Burden of Disease Research Unit, Tygerberg |
| <b>Primary Subject Heading</b>: | Health services research                                                                                                                                                                                                                                                                                                                                                                                       |
| Secondary Subject Heading:      | Health services research, Health informatics, Communication                                                                                                                                                                                                                                                                                                                                                    |
| Keywords:                       | Quality in health care < HEALTH SERVICES ADMINISTRATION & MANAGEMENT, PRIMARY CARE, PUBLIC HEALTH                                                                                                                                                                                                                                                                                                              |
|                                 |                                                                                                                                                                                                                                                                                                                                                                                                                |

SCHOLARONE™  
Manuscripts



1  
2 **1 Understanding the influence of the MomConnect programme on antenatal**  
3  
4 **2 and postnatal care service utilisation in two South African Provinces: A**  
5  
6 **3 Realist Evaluation Protocol**  
7  
8  
9

10 Eveline M. Kabongo<sup>1\*</sup>, Ferdinand C. Mukumbang<sup>2</sup>, Peter Delobelle<sup>2</sup>, Edward Nicol<sup>1,3</sup>,  
11  
12  
13

14  
15 <sup>1</sup> *Division of Health Systems and Public Health, Stellenbosch University, Cape Town, South Africa,*  
16

17 <sup>2</sup> *School of Public Health, University of the Western Cape, South Africa,*  
18

19 <sup>3</sup> *South African Medical Research Council (SA MRC) Cape Town, South Africa*  
20  
21  
22

23  
24  
25  
26 \*Corresponding author  
27

28 Ferdinand C. Mukumbang: [mukumbang@gmail.com](mailto:mukumbang@gmail.com)  
29  
30  
31

32 Eveline M. Kabongo: <https://orcid.org/0000-0002-6651-9097>  
33  
34

35 Ferdinand C. Mukumbang: <https://orcid.org/0000-0003-1441-2172>  
36

37 Peter Delobelle: <https://orcid.org/0000-0002-9016-7458>  
38

39 Edward Nicol: <https://orcid.org/0000-0001-6019-9259>  
40  
41  
42  
43  
44  
45  
46  
47  
48  
49  
50  
51  
52  
53  
54  
55  
56  
57  
58  
59  
60

## 28 ABSTRACT

29 **Introduction:** Timely antenatal care (ANC) and postnatal care (PNC) attendance decrease  
30 maternal and child mortality by improving maternal and child health (MCH) outcomes. Mobile  
31 health or mHealth has been identified as an effective way of improving the uptake of MCH  
32 services. The MomConnect programme is an mHealth initiative launched by the National  
33 Department of Health of South Africa in August 2014 to support MCH. Although widely used,  
34 there is a limited understanding of how, why, for whom and under which health system  
35 conditions, the implementation of MomConnect improves the health-seeking behaviour of  
36 pregnant women and mothers of infants in ANC and PNC facilities. This paper describes the  
37 protocol for a realist evaluation of the MomConnect programme, to provide a theory-based  
38 understanding of how, why and under what healthcare conditions the MomConnect programme  
39 works or not.

40 **Method and analysis:** The study will use the realist evaluation approach through its research  
41 cycle conducted in three phases. In phase one, a multi-method elicitation study design will be  
42 used, including a document review, key informant interviews and a scoping review to formulate  
43 an initial programme theory of the MomConnect intervention. Content and thematic analytic  
44 approaches will be used to analyse the data that will be fitted into a realist framework to  
45 formulate the initial programme theory. In phase two, a multi-case study design will be applied  
46 using a multimethod approach in two South African provinces. In each case, a theory-testing  
47 approach underpinned by the hypothetico-deduction analytic model will be used to test the  
48 initial programme theory. Surveys, interviews and focus group discussions will be conducted  
49 with various programme actors and analysed using appropriate methods. Phase three will entail  
50 refining the tested/modified programme theory through cross-case analysis.

51 **Expected outcomes:** An improved understanding of how and why the MomConnect  
52 intervention improves the health seeking behaviour of pregnant women and mothers of infants,  
53 and the health system conditions that influence its implementation.

54 **Ethics and dissemination:** Ethics approval was granted by the Stellenbosch University ethics  
55 committee (S18/09/189). The protocol has been designed and the study will be conducted in  
56 line with the principles of the Declaration of Helsinki (1964).

## 61 **Strength and limitation of the study**

- 62 • The study provides a blueprint on how, why and for whom the MomConnect  
63 programme works (or not) within the South African context.
- 64 • The proposed study will use a multi-case study design applying a mixed-methods  
65 approach, which allows for valid theories to be elicited, tested and refined.
- 66 • Although cross-case analysis and abstraction allows for theory refining, the cross-case  
67 analysis of four or more cases can be very challenging.
- 68 • The identification of what constitute a mechanism and context in some cases can be  
69 confusing.

70 **Key words:** mHealth, maternal health services, antenatal care, postnatal care, realist evaluation,  
71 MomConnect programme

## 73 **INTRODUCTION**

74 In recent decades, there has been greater use of antenatal (ANC) and postnatal care (PNC)  
75 services in South Africa, with higher rates of delivery assisted by professional healthcare  
76 providers.[1] ANC facilitates timely follow-up of pregnant women, to prevent complications  
77 such as premature delivery and pre-eclampsia, as well as predict the type of delivery, thereby  
78 reducing pregnancy-related morbidity and mortality.[2–4] Early PNC is important for the  
79 wellbeing of both mothers and new-borns, since it allows clinicians to screen for psychological  
80 and physical changes in the first days following birth.[4] Despite increasing utilisation in the  
81 country as a whole, access to early ANC and PNC services remains limited in certain  
82 provinces.[1]

83 In South Africa the maternal mortality ratio declined from 2014 to 2017, [5] with an  
84 institutional maternal mortality rate (iMMR) of 134/100 000 live births reported in 2016. The  
85 case fatality rate (CFRs) for excessive bleeding associated with caesarean delivery (BLDACD)  
86 dropped from 33.1 (2011 - 2013) to 31 (2014 - 2016) deaths per 100 000 caesarean  
87 deliveries.[5] In total, almost all (98%) of these cases occurred at tertiary hospitals in the public  
88 sector, where the majority of caesarean deliveries were performed, and attributable to referral  
89 from district hospitals after caesarean delivery with unresolved bleeding.[5] Complications of  
90 hypertension in pregnancy and obstetric haemorrhaging are hence still major causes of  
91 maternal mortality which can be prevented through early uptake of ANC and PNC services.[5]

1  
2 92 In order to achieve the health outcomes enshrined under the Sustainable Development Goals  
3 93 (SDGs), which include addressing the challenges faced by maternal and child health (MCH)  
4 94 service delivery,[4, 6, 7] South Africa developed a strategic plan to reduce maternal and child  
5 95 mortality by improving the uptake of ANC and PNC services. The plan included integrating  
6 96 mobile health technology (mHealth) into the healthcare system as a strategy to overcome  
7 97 barriers to universal health coverage.[7] The MomConnect programme is an example of the  
8 98 application of this mHealth technology. The present paper presents a protocol for evaluating  
9 99 the MomConnect programme in depth.

100 Towards this end, a realist evaluation is proposed to understand how, why, for whom and under  
101 what health systems conditions the MomConnect intervention achieves its goal of improving  
102 the uptake of MCH services.

103

## 104 **BACKGROUND**

105 mHealth is an element of electronic health (eHealth) used for the provision of healthcare  
106 services using information and communication technology (ICT).[8] mHealth places specific  
107 focus on the use of mobile phone technology based on text messages, regarded as a quick and  
108 cost-effective form of communication.[9] Since mobile phone broadband coverage reaches an  
109 estimated 69 % of the global population, the growing accessibility of mobile phones has  
110 supported the use of mHealth in public health.[10] Even people living in rural areas in low and  
111 middle-income countries (LMICs) have access to smart phones with internet connectivity [11,  
112 12] and about eight out of every ten people living in LMICs own a mobile phone.[13] In 2017,  
113 South Africa reached a mobile-cellular subscription rate of 162%.[14]

114 There is interest in the use of mHealth in MCH, since health facilities in LMICs are sometimes  
115 difficult to access due to long distances. The use of mHealth in LMICs may support MCH [12]  
116 by promoting healthier lifestyle habits, enhancing medication adherence, and enforcing regular  
117 attendance of follow-up visits, thereby helping to prevent perinatal complications.[15–17] In  
118 addition, the use of mHealth facilitates improves the communication between health care  
119 service providers and users [18], and promote the uptake of MCH services. Furthermore, a  
120 study by Feroz et al. [17] confirmed the relevance of mHealth initiatives in MCH as a tool for  
121 promoting health education and behavioural change, in turn leading to improved uptake of  
122 MCH services.[17] For example, the “Text4 Baby” intervention in the USA and Russia  
123 examined preparedness among new mothers towards improved MCH.[19] Mothers who

1  
2 124 received the Text4 Baby messages were three times more likely to feel ready and prepared to  
3  
4 125 be a mother compared to the control group.

5  
6 126 In South Africa, there has been specific interest in the Cell-Life Mobile Alliance for Maternal  
7  
8 127 Action (MAMA) SMS application as a tool for improving MCH outcomes. This service targets  
9  
10 128 pregnant women and mothers with babies up to three months' old and focuses on HIV  
11  
12 129 prevention as well as the prevention, particular mother-to-child transmission of HIV (PMTCT).  
13  
14 130 The use of the MAMA application improved health-seeking behaviour in the target population,  
15  
16 131 and increased the rates of exclusive breastfeeding, delivery in health facilities, use of skilled  
17  
18 132 birth attendants for delivery, and adherence to recommended ANC and PNC visits.[20, 21]  
19

### 20 134 **The MomConnect intervention or initiative**

21  
22 135 The MomConnect intervention is a prototype for mHealth in South Africa.[22]. MomConnect  
23  
24 136 is a flagship programme of the South African National Department of Health launched in  
25  
26 137 August 2014. The programme uses mobile phone technology to provide pregnant and  
27  
28 138 postpartum women with twice-weekly health information text messages, and access to a  
29  
30 139 helpdesk for patient queries and feedback. [23] [24] The ultimate goal of the MomConnect  
31  
32 140 programme is to register all pregnant women on a national database and provide users with  
33  
34 141 important information on health promotion via a platform for feedback, free of charge.[25]

35  
36 142 By dialling \*120\*550#, on a mobile phone, users subscribe to the MomConnect service and  
37  
38 143 receive messages which encourage them to register at the nearest clinic offering ANC services.  
39  
40 144 Once registered at a clinic, the user gains access to a two-way interactive system through  
41  
42 145 unstructured supplementary service data (USSD)-based surveys and help desk assistance.[23,  
43  
44 146 26] The help desk service is mostly used to obtain information on maternal health rather than  
45  
46 147 discussing the services received at a clinic.[26] Engelhard et al. [27] demonstrated the  
47  
48 148 feasibility and efficacy of the helpdesk in improving quality of care, but also emphasised the  
49  
50 149 need to benchmark its performance and explore opportunities for improvement elsewhere.[27]

51  
52 150 By August 2017, the MomConnect programme had registered over 1.7 million pregnant  
53  
54 151 women at over 95% of public health facilities, representing 63% of all women attending their  
55  
56 152 first antenatal care appointment and suggesting that the programme is meeting its target of  
57  
58 153 identifying and responding to users' needs.[28] An evaluation of the MomConnect programme  
59  
60 154 in 2016 showed that participants reported that the intervention empowered them to better  
155  
156 155 manage their health during pregnancy and that of their babies, and that mothers developed a  
particular connection with, and trusted the source of the messages.[29]

1  
2 157 The MomConnect programme has seen a rapid scaling-up through strong government support  
3  
4 158 and partnerships between key stakeholders. Because of its expanding coverage, MomConnect  
5  
6 159 represents a powerful platform for real-time data collection and linkage to additional services  
7  
8 160 to improve patient care.[23] The MomConnect initiative has contributed to the integration of  
9  
10 161 information systems to support MCH clinical services [30], and represents an important  
11  
12 162 starting point to link other health services and databases.[31] The challenges experienced  
13  
14 163 during the use of the MomConnect intervention in most clinics was related to poor network  
15  
16 164 coverage.[29] The need for improvement in areas such as registration and language has also  
17  
16 165 been highlighted.[29]

18 166 Studies to date have largely focused on the effectiveness of mHealth programmes such as the  
19  
20 167 use of SMS services to remind patients of the timely use of ANC and PNC services and its  
21  
22 168 resultant effect on health seeking behaviour.[17, 29, 32, 33] These studies did not provide  
23  
24 169 consistent results on how the use of mobile phones influences the uptake of ANC and PNC  
25  
26 170 services. For instance, Lefevre et al. [34] showed the importance of the MomConnect  
27  
28 171 programme in MCH, but other elements such as why some women used the services more than  
29  
30 172 others were not explored. In addition, the mechanisms through which the use of mobile phones  
31  
32 173 influences health seeking behaviour have not been clearly explained. Towards this end, a realist  
33  
34 174 evaluation is proposed to understand how, why, for whom and under what health systems  
35  
36 175 conditions the MomConnect programme improves the health-seeking behaviour of pregnant  
37  
36 176 women and mothers of infants in the uptake of MCH services.

37 177

## 38 178 **Study setting**

39 179 The study will be conducted in the Gauteng (GT) and Free State (FS) provinces of South Africa  
40  
41 180 (Figure 1). These provinces were selected based on the highest (GT) and lowest (FS) rates of  
42  
43 181 MomConnect registration from September 2014 to June 2017. GT accounted for 299,417  
44  
45 182 (22.2%) and FS for 64,416 (4.8%) of the total number of national registrations of 1,337,889  
46  
47 183 for this period.[34] The district health barometer (DHB) 2016/2017 reported 71.2% of PNC  
48  
49 184 visits within six days in GT which is higher than the national average of 75% and also lower  
50  
51 185 than that of FS (85.9%), which is higher than the national average. ANC first visit before 20  
52  
53 186 weeks was 58.4% in GT far less than the national average in the same period (1). However, our  
54  
55 187 selection of study participating provinces is based on the highest and lowest rates of  
56  
57 188 MomConnect registration and not on ANC/PNC attendance rates. GT and FS provinces differ  
58  
59 189 from each other in terms of socio-economic and demographic characteristics of their  
60  
190 190 inhabitants.[1] The use of mobile phones in GT and FS in 2016 were 98.2% and 94.9%



1  
2 191 respectively.[35] Table 1 presents information on the socioeconomic and demographics  
3  
4 192 characteristics of the populations living in GT and FS. Western Rand and Johannesburg city  
5  
6 193 districts were identified as study settings located in the best resourced province (GT), while in  
7  
8 194 FS (less resourced province) two districts, Xhariep and Fezile Dabi were selected. Xhariep is  
9  
10 195 the largest district in FS and is among the best resourced' districts in provinces. The selected  
11  
12 196 sub-districts in which the study facilities will be chosen included Randfontein and  
13  
14 197 Johannesburg Sub-district A in GT and FS Naledi and Moqhaka see table 1. The DHIS data  
15  
16 198 2016 was used to select the district and sub-districts included in the study. The details on how  
17  
18 199 districts and sub-districts was selected is provided in the sampling section.

200  
201 **Table 1 Socioeconomic and demographic factors**

|                         | <b>Gauteng</b>                                                                                                                                                                                                                                                | <b>Free state</b>                                                           |
|-------------------------|---------------------------------------------------------------------------------------------------------------------------------------------------------------------------------------------------------------------------------------------------------------|-----------------------------------------------------------------------------|
|                         | <b><i>1. Western Rand district</i></b>                                                                                                                                                                                                                        | <b><i>1. Xhariep district</i></b>                                           |
| Population              | 884 031                                                                                                                                                                                                                                                       | 135,036                                                                     |
| Sub-districts           | Sub-districts:4<br>1. Randfontein<br>2. Westonaria<br>3. Merafong City<br>4. Mogale City                                                                                                                                                                      | Sub-districts:4<br>1. Kopanong<br>2. Naledi<br>3. Mohokare<br>4. Letsemeng  |
| Houses headed by female | 31.75%                                                                                                                                                                                                                                                        | 37.6%                                                                       |
| formal dwelling         | 76.3%                                                                                                                                                                                                                                                         | 89.1%                                                                       |
| Unemployment rate       | 26.3%                                                                                                                                                                                                                                                         | 26.8%                                                                       |
|                         | <b><i>2. Johannesburg city district</i></b>                                                                                                                                                                                                                   | <b><i>2. Fezile Dabi district</i></b>                                       |
| Population              | 5,006,517                                                                                                                                                                                                                                                     | 507,525                                                                     |
| Sub-districts           | Sub-districts:7<br>1. Johannesburg Sub-district A<br>2. Johannesburg Sub-district B<br>3. Johannesburg Sub-district C<br>4. Johannesburg Sub-district D<br>5. Johannesburg Sub-district E<br>6. Johannesburg Sub-district F<br>7. Johannesburg Sub-district J | Sub-districts: 4<br>1. Mafube<br>2. Moqhaka<br>3. Ngwathe<br>4. Metsimaholo |
| Houses headed by female | 37.7%                                                                                                                                                                                                                                                         | 37.5%                                                                       |
| Formal dwelling         | 81.3%                                                                                                                                                                                                                                                         | 85.6%                                                                       |
| Unemployment rate       | 61.5%                                                                                                                                                                                                                                                         | 33.9%.                                                                      |

202 **Sources:** DHB 1016/1017 and DHIS data 2016

203 The district health barometer (DHB) 2016/2017 reported 71.2% of PNC visits within six days  
204 in GT, which is lower than the national target of 75% and FS (85.9%). ANC first visits before  
205 20 weeks was 58.4% less than the national target of 62.1 in GT while FS had 65.8% of ANC

1  
2 206 first visits in the same period.[1] However our selection of provinces is based on highest and  
3  
4 207 lowest rate of the MomConnect registration as mentioned above in this section and not on  
5  
6 208 ANC/PNC.

7  
8 209 *Figure 1: Map of South Africa and study settings (Setting 1: Gauteng and Setting 2: Free State)*  
9

10 210

## 11 211 **Methods**

12  
13  
14 212 The study will be guided by the realist evaluation approach, which was introduced through the  
15  
16 213 seminal work of Pawson and Tilley [36] to address the question: ‘What works, for whom, why,  
17  
18 214 in what situation, and how?’ with regards to intervention, programmes and policies. The  
19  
20 215 philosophical ontology of realist evaluation is realism and its epistemological foundation lies  
21  
22 216 in scientific realism.[36] Realist evaluation belongs to the family of theory-driven approaches  
23  
24 217 of evaluation. In this light, the approach aims to develop and refine hypotheses of generative  
25  
26 218 causality explicating why and how intervention inputs bring about changes in key  
27  
28 219 outcomes.[37] The proposed study will be developed following three different phases, as  
29  
30 220 described in Figure 2 and reported following the guidelines for reporting realist evaluation  
31  
32 221 studies.[37]

33  
34 222 *Figure 2: Study design showing Phases 1 to 3 adapted from [38, 39] (source: study author).*  
35  
36 223

### 37 224 **Phase 1: Gleaning the initial programme theory (12-18 months)**

38  
39 225 Phase 1 will address the first objective of the study re-formulating the initial programme theory  
40  
41 226 (IPT) of how the MomConnect programme was expected to work for different actors  
42  
43 227 (designers, health workers and MCH clients). A multi-method elicitation study will be  
44  
45 228 conducted using data collected from the following sources: document review, exploratory  
46  
47 229 study with key informant interviews and a scoping review [40]. Since Phase one of the study  
48  
49 230 require many sub-studies it is estimated to take between 12 to 18 months depending on funding  
50  
51 231 availability.

#### 52 232 **Document review**

53  
54 233 The document review will explore documents such as the action plans, staff meeting reports  
55  
56 234 and other minutes; any literature on MomConnect; and the national monitoring and evaluation  
57  
58 235 report. Permission will be requested from the MomConnect monitoring and evaluation team to  
59  
60 236 access these documents and explore how MomConnect was developed, who participated and  
237 with what intended objectives.



Document analysis [41] as a methodological process for review and evaluation will be used to examine and interpret MomConnect documents, including capturing the meaning, gaining understanding, and developing empirical knowledge on how the intervention was developed and implemented.[41] The Intervention-Context-Actors-Mechanism-Outcomes (ICAMO) heuristic tool [42] will be used to guide a content analysis approach.

### 243 **Exploratory qualitative study**

244 An exploratory qualitative analysis of programme managers and designers' assumptions and perspectives will be undertaken simultaneously [43]. In-depth interviews (IDIs) with 5-10 key informants, including programme designers (those who assisted in programme conceptualisation) and managers (those who assisted in programme implementation and coordination) will be conducted to explore their expectations on how MomConnect was supposed to work. Key informants will be selected using purposive sampling and face-to-face interviews will be conducted using an interview guide with each key informant.

251 The IDIs with key informants will be audio-recorded and transcribed verbatim. Summary sheets and field notes will be written up for each interview at the end of the day. Thematic analysis based on the generic inductive approach [43] will be conducted using Atlas.ti software version 8.0.

### 255 **Scoping Review**

256 The scoping review of research conducted on mHealth and MCH will be performed by searching the following databases: Academic research complete, Medline, Pubmed, Scopus, Health System Evidence and Google scholar using MeSH terms. The following MeSH terms combinations (Boolean phrases) will be used to search the identified databases: ["mHealth" AND "maternal health"], ["mobile phone" AND "maternal health" AND "child health"], ["mHealth AND "maternal health services"], [mHealth PRE/15 maternal] and [mHealth PRE/15 maternal AND child AND health].

263 A thematic analysis [44] will be used to explore the various modalities of mHealth, relevant context conditions, possible generative mechanisms and important outcomes reported in other studies conducted on mHealth interventions and MCH. Using abductive reasoning, we will conduct configurational mapping informed by the ICAMO heuristic tool to formulate tentative models of how and why mHealth programmes work in general.

268  
269

## 270 **Formulating the initial programme theory (IPT)**

271 A configurational mapping approach [42] guided by the ICAMO heuristic tool will be used to  
272 synthesise the information gleaned from the document review, qualitative exploration study  
273 with key informants and scoping review, to formulate the IPT that will be tested in phase  
274 two.[42] The theory formulated will be informed by various abductive reasoning through  
275 deductive, inductive, and retroductive reasoning forms of inferences making.

## 276 **Phase 2: Testing the initial programme theory (12 -18 months)**

277 The IPT formulated in phase I will be tested in the selected cases using a multi-method study  
278 design. In each case, a theory refining research approach will be used, underpinned by the  
279 hypothetico-deduction analytic model informed by data from both quantitative and qualitative  
280 methods.[39, 45] Quantitative assessments will be performed using a cross-sectional design,  
281 whereby a survey will be used to explore how socio-economic characteristics influence the  
282 uptake of MCH to determine for whom the intervention works. The cross-sectional study could  
283 also point to possible mechanism to allow to identify possible regularity and demi-regularity.  
284 The qualitative approaches will help us explore the different mechanisms and various context  
285 conditions by which the outcomes are generated.

## 286 **Sampling and data collection**

287 A representative sampling frame from the district health information system (DHIS) was used  
288 to obtain the sampling for this study focusing on ANC first visits before 20 weeks for June  
289 2016. This period was the latest month in the master frame data of DHIS used to calculate the  
290 sample. All the districts in each province were drawn to identify districts with the highest and  
291 lowest ANC first visits before 20 weeks. In GT, West Rand and Johannesburg District have  
292 the highest District with (69.0%) and lowest (57.3%) rates respectively. Randfontein Sub-  
293 district in West Rand District, Randfontein was identified as the best sub-district with the  
294 highest rate of ANC first visits before 20 weeks (80.3%), while Johannesburg A was the sub-  
295 district with the lowest rate in the Johannesburg district (50.6%). Similarly, in the FS Province  
296 the districts with the highest (73.4%) and lowest (69.1%) rates are Xhariep and Fezile Dabi  
297 districts respectively. Naledi Sub-district (Xhariep District) was identified as the sub-district  
298 with the highest rate (80.4%) while Moqhaka Sub-district (Fezile Dabi District), the sub-district  
299 with the lowest rate (55.0%).

300 OpenEpi software and MS Excel was used to randomly select four facilities in each sub-district  
301 (see Table 2). The sample size in each facility was calculated [46], assuming 50% prevalence

of MCH services agreement per facility, a precision (d) of 0.10 and a 95% confidence interval. The monthly estimated number of MCH visits for each facility and the proportion of ANC first visits before 20 weeks was used to calculate the sample size using an online calculator.[46] In cases where the ratio of the sample size (n) to the population size (N) is greater than 5%, finite population correction (FPC) was used.[47] The number of users found in all four facilities will be multiplied by a design effect (DE) of 1.5 to get the total number of participants (Table 2).

**Table 2** Selected sample by districts, sub-districts, facilities and participants

| District             | Gauteng<br>(District with highest rate)               | Gauteng<br>(District with lowest rate)                | Free State<br>(District with highest rate)                | Free State<br>(District with lowest rate)                     |
|----------------------|-------------------------------------------------------|-------------------------------------------------------|-----------------------------------------------------------|---------------------------------------------------------------|
| Sub-District         | Randfontein sub-district (8 facilities)               | Johannesburg A (14 facilities)                        | Naledi (4 facilities)                                     | Moqhaka (9 facilities)                                        |
| Facility             | Kocksoord Clinic<br>ANC 1 visit < 20 weeks<br>= 82.0% | Mayibuye Clinic<br>ANC 1 visit, < 20 weeks<br>= 49.0% | Vanstadensrus Clinic<br>ANC 1 visit < 20 weeks<br>= 75.0% | Thusanong (Kroon) clinic<br>ANC 1 visit < 20 weeks<br>= 69.0% |
| Sample per facility* | Number of participants =<br>53 x 1.5 = 80             | Number of participants =<br>85 x 1.5 = 127            | Number of participants =<br>66 x 1.5 = 99                 | Number of participants =<br>74 x 1.5 = 111                    |

\*Estimated number of participants (based on proportional sampling)

The study participants will include all pregnant women and mothers of infants registered under the MomConnect programme, who are 18 years of age or older, irrespective of parity (including stillbirths/miscarriages), and socio-economic status. They will be identified through the MomConnect registration registers at facility level. Health care providers (HCP) will include clinical staff in charge of ANC and PNC at facility level and will be selected based on their prior experience with the MomConnect programme.

A structured questionnaire survey tool has been developed (**Additional file 1**) to collect quantitative data from pregnant women and mothers of infants registered with the MomConnect programme. This tool will assess their understanding of how psychological determinants, socio-cultural context and structural context influence their uptake of MCH services. An appointment will be made with each participant, using the contact details captured in the MomConnect database, to invite them to the facility to participate in the study. In addition, the survey instruments will be administered telephonically to those participants who are unable to visit the facility during the study period.

Furthermore, a facility assessment questionnaire (**Additional file 2**) will be administered to HCPs at facility level to explore the structural and contextual attributes that may influence the uptake of ANC and PNC services. Furthermore, a facility assessment questionnaire will be

1  
2 328 administered to HCPs to explore the structural and contextual attributes that may influence the  
3  
4 329 uptake of ANC and PNC services.

5  
6 330 Qualitative assessments will include in-depth interviews (IDIs) and focus group discussion  
7  
8 331 (FGDs). An estimated 10 to 20 IDI will be conducted with HCPs at facility level to explore  
9  
10 332 their perceptions (resources, implementation processes and programme uptake) of the  
11  
12 333 MomConnect programme (See **Additional Files 3, 4 and 5** for interview and FGD guidelines  
13  
14 334 with patients and healthcare providers). Four FGDs (one per facility) consisting of between 10  
15  
16 335 and 15 participants will be conducted by the field workers and the principal researcher to  
17  
18 336 ascertain participants perceptions regarding the uptake of MCH services and expectations of  
19  
20 337 the MomConnect programme. Daily activities in selected ANC and PNC facilities will be  
21  
22 338 observed as well. IDIs and FGDs will be audio-recorded and transcribed verbatim to be  
23  
24 339 analysed using Atlas ti 8.0. The interview guide and survey questionnaire are designed in  
25  
26 340 English but will be translated into the local language used in the different study settings  
27  
28 341 (Afrikaans, Setswana, Sesotho, Zulu, Xhosa) and back translated in English. Data gathered  
29  
30 342 from the above sources will be transcribed, translated and back translated in preparation for  
31  
32 343 analysis.

33  
34 344 In each case, a theory refining research approach underpinned by the hypothetico-deduction  
35  
36 345 analytic model will be used for both quantitative and qualitative study.[39, 45] The  
37  
38 346 hypothetico-deduction approach is most appropriate when testing an existing theory or a theory  
39  
40 347 formulated *a priori*. This approach allows for various aspects and the entire hypothesis or initial  
41  
42 348 theory to be examined in light of the new evidence that is emerging in the various cases.

#### 43 349 **Data analysis**

44  
45 350 Inferential and descriptive analyses of the quantitative data including proportions and  
46  
47 351 frequencies will be performed using Stata version 15. Socio-economic and demographic data  
48  
49 352 will be used as independent variables while the uptake of MCH will be used as the dependent  
50  
51 353 variable, which will allow us to determine for whom the intervention works. For bivariate  
52  
53 354 analysis, categorical data will be analysed using Chi-squared test. Logistic regression models  
54  
55 355 will be constructed to assess the effects of independent variables as predictors of dependent  
56  
57 356 outcomes of interest. The power of each dependent variable will be tested before the variable  
58  
59 357 is included in the model and only the variable with positive outcomes will be maintained. A p-  
60  
358 value of <0.05 will be used to indicate statistical significance along with a 95% corresponding  
359 confidence interval (CI).

1  
2 360 For qualitative data, IDI and FGDs will be analysed separately using a thematic content  
3  
4 361 analysis approach to identify and make explicit the mechanism by which observed outcomes  
5  
6 362 are generated using the ICAMO framework. FGDs and IDI transcripts will be uploaded onto  
7  
8 363 Atlas.ti 8.0 for analysis. The qualitative data analysis will comprise two main activities:

9  
10 364 For the qualitative data deductive and inductive thematic analyses will be applied to analyse  
11  
12 365 the data collected through observation, IDIs and FGDs following these seven steps: (1)  
13  
14 366 Familiarising with the data set; (2) development of a coding framework, (3) coding a portion  
15  
16 367 of the dataset for each case study (4) testing code reliability, (5) identifying initial themes  
17  
18 368 emerging from the data, (6) using the code manual to apply codes to the entire script, and (7)  
19  
20 369 connecting codes into themes through an interpretation process.

### 21 370 **Modifying the initial programme theory**

22  
23 371 In-case analysis [36] will be conducted using retroductive reasoning [48] to modify the ICAMO  
24  
25 372 elements through configuration mapping based on the data obtained from each case to modify  
26  
27 373 the IPT. In other words, ICAMO configurations will be modified into case-based programme  
28  
29 374 theories (for each of the four facilities). Each case-based modified theory will be tested to check  
30  
31 375 their explanatory power through the process of counterfactual thinking towards a functional  
32  
33 376 theory.[49] ICAMO matrices will be used to present data for each higher-level outcome of  
34  
35 377 concern.

### 36 378 **Phase 3: Refining the modified programme theory (6-12 months)**

37  
38 379  
39  
40 380 A cross case analysis of the four case studies will be conducted using *retroductive* reasoning  
41  
42 381 to construct ICAMO matrices (ICAMO configuration obtained from each of the four case  
43  
44 382 studies) to obtain a refined programme theory or model. The cross-case analysis will allow us  
45  
46 383 to obtain a more refined programme theory to the IPT and the case-specific theories. A refined  
47  
48 384 theory is a clear or functional explanation theory that can be used to give details of the  
49  
50 385 programme elements and their roles in orchestrating the observed outcomes in certain context  
51  
52 386 conditions for the different actors involved. This refined theory although obtained through  
53  
54 387 abstraction, remains close enough to the observed data, yet provides explanations that are  
55  
56 388 sufficiently general to explain outcomes across settings and social activities.[36]

57 389

### 58 390 **Quality control**

1  
2 391 The RAMESIS II guideline for conducting and reporting realist evaluation [37] will be used to  
3  
4 392 ensure quality control in the study.  
5

6 393 First, to elicit the IPT, all the above steps will be followed to ensure the trustworthiness of data  
7  
8 394 collected from various sources, thus capturing a wide range of intended and unintended  
9  
10 395 outcomes, context-mechanism interactions and relevant actors.  
11

12 396 In phase 2, to assess the reliability of data collection, a pilot study will be conducted in two  
13  
14 397 healthcare facilities selected for convenience in the sub-district with the highest and lowest  
15  
16 398 rates of ANC first visits before 20 weeks in GT and FS, respectively. The pilot will include  
17  
18 399 health care providers (HCPs), pregnant women and mothers.  
19

20 400 At all levels of the study, quality control and credibility will be assured through data  
21  
22 401 familiarisation by all the investigators and discursive interactions.  
23

24 402

## 25 403 **Ethics and dissemination**

26  
27 404 Ethics approval has been granted by the Health Research Ethics Committee (HREC) of the  
28  
29 405 Stellenbosch University (Ref No: S18/09/189). An approval to conduct the study in the selected  
30  
31 406 facilities is currently being processed by the relevant provincial Department of Health. Consent  
32  
33 407 forms will be used to obtain permission from study participants before data collection. Personal  
34  
35 408 information will be protected by not disclosing names during data analysis or reporting.  
36  
37 409 Different papers will be published from the study, and the results will be presented in academic  
38  
39 410 open day, national and international conferences.  
40

41 411

## 42 412 **DISCUSSION**

43  
44 413 Despite the relevance of mHealth in improving MCH being increasingly recognised [50], an  
45  
46 414 empirical investigation to understand how the outcomes are generated is still lacking. This  
47  
48 415 protocol specifies the research plan to investigate how and why the MomConnect programme  
49  
50 416 works or achieves its goal of improving MCH services in South Africa. Study investigators  
51  
52 417 will also seek to understand MomConnect as part of an mHealth programme that uses mobile  
53  
54 418 phones by focusing on how contextual factors affect the use of MCH services.  
55

56 419 The proposed study draws on a theory-driven evaluation (TDE) approach, which describes a  
57  
58 420 process under which components are hypothesised to affect outcomes, and considers the  
59  
60 421 specific conditions under which such processes operate.[38] TDE is commonly used in the  
422 422 social sciences to investigate how programmes cause intended or observed outcomes [51], as



1  
2 423 well as address issues around internal and external validity, which is of potential relevance to  
3  
4 424 both researchers and policymakers.[38, 52, 53] The proposed study will use a realist evaluation  
5  
6 425 approach, which is a type of TDE.[37] Pawson and Tilley [36] developed the realist evaluation  
7  
8 426 to address the question: ‘What works, for whom, why, in what situation and how?’ TDE will  
9  
10 427 be used in this study to assess in particular how the use of mobile phones influences the uptake  
11  
12 428 of MCH services. The protocol is an important quality tool as it allows for follow-up by  
13  
14 429 anticipating the challenges and barriers that may occur during the study.[54, 55] This study  
15  
16 430 protocol also assists in thinking through how to generate the internal consistency and external  
17  
18 431 validity of results and to explain how the interventions works in a given context to produce the  
19  
20 432 observed outcome. The lack of such protocol can lead to some issues, such as lack of  
21  
22 433 explanation of the change at or between individual, institutional or contextual levels because  
23  
24 434 these were not documented from the start.[56] Moreover, writing a detailed research protocol  
25  
26 435 is important in helping other researchers to replicate relevant study findings for contribution  
27  
28 436 towards the broader research community. Constructing a comprehensive protocol including  
29  
30 437 clear aims, rationale, analysis plans and expectations lends additional credibility to research  
31  
32 438 across study fields. [56]

33  
34 439 It is expected that this study will improve our understanding of how and why the MomConnect  
35  
36 440 intervention impacts the health seeking behaviours of pregnant women and mothers of infants.  
37  
38 441 This study is also expected to provide a detailed description of the health system conditions  
39  
40 442 that influence the implementation of the MomConnect programme to improve the uptake of  
41  
42 443 ANC and PNC services. Finally, the study will provide some recommendations to improve the  
43  
44 444 rollout and implementation of MomConnect elsewhere.

45  
46 445 **Contributors:** The study was conceived by EMK and PD. The first manuscript was written by  
47  
48 446 EMK. FCM and EN provided methodological support. FCM, PD, EN provided critical and  
49  
50 447 contribution towards developing and refining the manuscript. All authors read and approved the  
51  
52 448 final manuscript.

53  
54 449 **Funding:** There are no funders to report for this submission

55  
56 450 **Competing interest:** The authors declared no potential competing interest with respect to the  
57  
58 451 research, authorship, and/or publication of this article.

59  
60 452 **Ethics approval:** Stellenbosch University Human research ethics committee (Ref No  
453  
454 S18/09/189).

455  
456 457 **Patient and public involvement:** No patient involved

## References

- 455
- 456 [1] Massyn N, Padarath A, Peer N, et al. *District Health Barometer*. 2017.  
 457 [www.hst.org.za/.../District-Health-Barometer-201617.aspx](http://www.hst.org.za/.../District-Health-Barometer-201617.aspx)
- 458 [2] Symon A, Pringle J, Cheyne H, et al. Midwifery-led antenatal care models : mapping a  
 459 systematic review to an evidence-based quality framework to identify key components and  
 460 characteristics of care. *BMC Pregnancy Childbirth* 2016;16(1):168.
- 461 [3] Ram F, Singh A. Is antenatal care effective in improving maternal health in rural Uttar  
 462 Pradesh? Evidence from a district level household survey. *Journal of biosocial Science* 2006;  
 463 38: 433–448.
- 464 [4] Massyn N, Peer N, Padarath A, et al. *District Health Barometer*. 2016. [www.hst.org.za/.../District-Health-Barometer-201516.aspx](http://www.hst.org.za/.../District-Health-Barometer-201516.aspx)
- 466 [5] Moodley J, Chh MB, Fawcus S, et al. Improvements in maternal mortality in South Africa.  
 467 *South African Medical Research* 2018;108(3):4–8..
- 468 [6] Sachs JD. From millennium development goals to sustainable development goals. *Lancet*  
 469 (*London, England*) 2012; 379(9832):2206–11
- 470 [7] Le Blanc D. Towards Integration at Last? The Sustainable Development Goals as a Network  
 471 of Targets. *Sustainable Development* 2015;23(3):176–87
- 472 [8] Aranda-Jan CB, Mohutsiwa-Dibe N, Loukanova S. Systematic review on what works, what  
 473 does not work and why of implementation of mobile health (mHealth) projects in Africa. *BMC*  
 474 *Public Health* 2014;14(1):188–203
- 475 [9] Kaplan W. Can the Ubiquitous power of mobile phones be used to improve health outcomes in  
 476 developing countries? *Global Health* 2006;2(1):9.
- 477 [10] SANOU B. ICT Facts & Figures. The world in 2015. *Itu 150 Años (1865 - 2015)* 2015; 1–6.  
 478 Available from: [http://www.itu.int/en/ITU-](http://www.itu.int/en/ITU-D/Statistics/Documents/facts/ICTFactsFigures2015.pdf)  
 479 [D/Statistics/Documents/facts/ICTFactsFigures2015.pdf](http://www.itu.int/en/ITU-D/Statistics/Documents/facts/ICTFactsFigures2015.pdf)
- 480 [11] Premji S. Mobile health in maternal and newborn care: Fuzzy logic. *International Journal of*  
 481 *Environmental Research Public Health* 2014;11(6):6494–503.
- 482 [12] Oyeyemi SO, Wynn R. The use of cell phones and radio communication systems to reduce  
 483 delays in getting help for pregnant women in low- and middle-income countries: a scoping  
 484 review. *Global Health Action* 2015 Dec 10;8(1):28887–95.
- 485 [13] World Bank. World Development Report 2016: Digital Dividends,  
 486 <http://www.worldbank.org/en/publication/wdr2016> (2016, accessed 25 January 2018).



- 1  
2 487 [14] Services P. South Africa Profile ( Latest data available : 2017 ). 2017; 1–3.  
3  
4 488 [15] Watterson JL, Walsh J, Madeka I. Using mHealth to Improve Usage of Antenatal Care,  
5 489 Postnatal Care, and Immunization: A Systematic Review of the Literature. *BioMed Research*  
6 490 *International*. Epub ahead of print 2015. DOI: 10.1155/2015/153402.  
7  
8  
9 491 [16] Poorman E, Gazmararian J, Parker RM, et al. Use of Text Messaging for Maternal and Infant  
10 492 Health: A Systematic Review of the Literature. *Matern Child Heal* 2015;19(5):969–89.  
11  
12  
13 493 [17] Feroz A, Perveen S, Aftab W. Role of mHealth applications for improving antenatal and  
14 494 postnatal care in low and middle income countries: A systematic review. *BMC Health Service*  
15 495 *Research* 2017;17(1):704.  
16  
17  
18 496 [18] Wambugu S, Villella C. mHealth for Health Information Systems in Low- and Middle-Income  
19 497 Countries: Challenges and Opportunities in Data Quality, Privacy, and Security. *mHealth*  
20 498 *Information System* 2016; 1–19.  
21  
22  
23 499 [19] Parker RM, Dmitrieva E, Frolov S, et al. Text4baby in the United States and Russia: An  
24 500 Opportunity for Understanding How mHealth Affects Maternal and Child Health. *Journal of*  
25 501 *Health Commun* 2012;17(1):30–6.  
26  
27  
28 502 [20] USAIDS. Mobile Alliance for Maternal Action (MAMA). *mHealth knowledge*,  
29 503 <http://www.mhealthknowledge.org/search/site/MAMA> (2015).  
30  
31  
32 504 [21] Ausen-anifrani S, Burman MK, Pastick K. SMS Maama. *United Nation Found* 2016; 1–14.  
33 505 Available from: <http://www.askmama.co.za/>.  
34  
35  
36 506 [22] Peter JE, Barron P, Pillay Y. Using mobile technology to improve maternal, child and youth  
37 507 health and treatment of HIV patients. *South African Mededical Journal* 2016;106(1):3  
38  
39  
40 508 [23] Barron P, Peter J, LeFevre AE, et al. Mobile health messaging service and helpdesk for South  
41 509 African mothers (MomConnect): history, successes and challenges. *BMJ Global Health*  
42 510 2018;3(2):e000559  
43  
44  
45 511 [24] Seebregts C, Dane P, Parsons AN, et al. Designing for scale : optimising the health  
46 512 information system architecture for mobile maternal health messaging in South Africa (  
47 513 MomConnect ). *BMJ Global Health* 2018;2(3):1–7.  
48  
49  
50 514 [25] Mehl GL, Tamrat T, Bhardwaj S, et al. Digital health vision : could MomConnect provide a  
51 515 pragmatic starting point for achieving universal health coverage in South Africa and  
52 516 elsewhere ? *BMJ Global Health* 2018;3(2):1–5.  
53  
54  
55 517 [26] Xiong K, Kamunyor J, Sebidi J. The MomConnect helpdesk : how an interactive mobile  
56 518 messaging programme is used by mothers in South Africa. *BMJ Global Health*  
57 519 2018;3(2):000578.

- 1  
2 520 [27] Engelhard M, Copley C, Watson J, et al. Optimising mHealth helpdesk responsiveness in  
3 521 South Africa : towards automated message triage. *BMJ Global Health* 2018;3(2):1–9.
- 4  
5 522 [28] Pillay Y, Motsoaledi PA. Digital health in South Africa : innovating to improve health. *BMJ*  
6 523 *Glob Heal* 2018; 4–6.
- 7  
8  
9 524 [29] Skinner D, Delobelle P, Pappin M, et al. User assessments and the use of information from  
10 525 MomConnect , a mobile phone text-based information service , by pregnant women and new  
11 526 mothers in South Africa. *BMJ Gloalb Healthl* 2018;3(2):e000561.
- 12  
13  
14 527 [30] Heekes A, Tiffin N, Dane P, et al. Self-enrolment antenatal health promotion data as an  
15 528 adjunct to maternal clinical information systems in the Western Cape Province of South  
16 529 Africa. *BMJ Glob Health* 2018;3(2):e000565.
- 17  
18  
19 530 [31] Peter J, Benjamin P, Lefevre AE, et al. Taking digital health innovation to scale in South  
20 531 Africa : ten lessons from MomConnect. *BMJ Gloalb Health* 2018;3(2):1–4.
- 21  
22  
23 532 [32] Free C, Phillips G, Watson L, et al. The Effectiveness of Mobile-Health Technologies to  
24 533 Improve Health Care Service Delivery Processes: A Systematic Review and Meta-Analysis.  
25 534 *PLoS Medecine* 2013;10(1):e1001363.
- 26  
27  
28 535 [33] Agarwal S, Perry HB, Long L-A, et al. Evidence on feasibility and effective use of mHealth  
29 536 strategies by frontline health workers in developing countries: systematic review. *Tropical*  
30 537 *Medecine International Health* 2015 Aug;20(8):1003–14.
- 31  
32  
33 538 [34] Lefevre AE, Dane P, Copley CJ, et al. Unpacking the performance of a mobile health  
34 539 information messaging program for mothers ( MomConnect ) in South Africa : evidence on  
35 540 program reach and messaging exposure. *BMJ Global Health* 2018;3(2):e000553.
- 36  
37  
38 541 [35] Statistics South Africa c. *General Household Survey 2016*. 2018.  
39 542 <http://microdata.worldbank.org/index.php/catalog/2879/>
- 40  
41  
42 543 [36] Pawson R, Tilley N. *Realistic evaluation*. Sage, 1997.  
43 544 <https://journals.sagepub.com/doi/pdf/10.1177/109821409902000221>
- 44  
45  
46 545 [37] Wong G, Westhorp G, Manzano A, et al. RAMESES II reporting standards for realist  
47 546 evaluations. *BMC Medecine* 2016;14(1):96–114.
- 48  
49  
50 547 [38] Van Belle SB, Marchal B, Dubourg D, et al. How to develop a theory-driven evaluation  
51 548 design? Lessons learned from an adolescent sexual and reproductive health programme in  
52 549 West Africa. *BMC Public Health* 2010;10(1):141–51.
- 53  
54  
55 550 [39] Mukumbang FC, Marchal B, Belle S Van, et al. Unearthing how , why , for whom and under  
56 551 what health system conditions the antiretroviral treatment adherence club intervention in South  
57 552 Africa works : A realist theory refining approach. *BMJ Global. BMC Health Services*

- 1  
2 553 *Research; 2018;18(1):343.*  
3
- 4 554 [40] Downs DS, and Hausenblas HA. Elicitation studies and the theory of planned behavior : a  
5 systematic review of exercise beliefs. *Psychology of Sport and Exercise* 2005;6(1):1–31.  
6 555
- 7  
8 556 [41] Bowen GA. Document analysis as a qualitative research method. *Qualitative Research Journal*  
9 557 2009;9(no.2):27–40.
- 10  
11 558 [42] Mukumbang FC, Marchal B, Belle S Van, et al. A realist approach to eliciting the initial  
12 programme theory of the antiretroviral treatment adherence club intervention in the Western  
13 Cape Province , South Africa. *BMC Medical Researchs Methodology* 2018;18(1):47.  
14 559  
15 560
- 16  
17 561 [43] Thomas DR. A General Inductive Approach for Analyzing Qualitative Evaluation Data.  
18 562 *American Journal of Evaluation* 2006;27(2):237–46.
- 19  
20 563 [44] Ritchie J, Spencer L. Qualitative Data Analysis for Applied Policy Research. *The qualitative*  
21 564 *researcher's companion* 2002; 305–329.
- 22  
23 565 [45] Eastwood JG, Jalaludin BB, Kemp LA. Realist explanatory theory building method for social  
24 566 epidemiology : a protocol for a mixed method multilevel study of neighbourhood context and  
25 567 postnatal depression. *Springer Plus* 2014;3(1):12.
- 26  
27  
28  
29 568 [46] Naing L, Winn T, Rusli BN. Practical Issues in Calculating the Sample Size for Prevalence  
30 569 Studies. *Arch Orofac Sci* 2006; 1: 9–14.
- 31  
32 570 [47] Burstein H. Finite Population Correction for Binomial Confidence Limits. *Journal of the*  
33 571 *American Statistical Association.* 1975;70(349):67–9.
- 34  
35 572 [48] Zoltan D. Plenary Speech Researching complex dynamic systems : ‘ Retrodictive qualitative  
36 573 modelling ’ in the language classroom. *Cambridge University Pree* 2011;47(1):80–91.
- 37  
38 574 [49] Roese NJ. Counterfactual Thinking. *American Psychological Association* 1997;121(1):133–48.  
39  
40  
41 575 [50] Lee H.S., ulugbek B. N., Bright I N, Mome M, ILiz Grant CP. Effextiveness of mHealth  
42 576 intervention for maternal, newborn and child health in low-and middle-income countries:  
43 577 Systematic review and meta-analysis. *Glob Health* 2016;6(1):1–17.
- 44  
45 578 [51] Coryn CLS, Noakes LA, Westine CD, et al. A systematic review of theory-driven evaluation  
46 579 practice from 1990 to 2009. *American Journal of Evaluation.* 2011;32(2):199–226.
- 47  
48 580 [52] Chen HT. The conceptual framework of the theory-driven perspective. *Evaluation Program*  
49 581 *Planning.* 1989;12(4):391–6.
- 50  
51 582 [53] Chen H-T, Rossi H. Issues in the Theory-Driven. *Evaluation Program Planning, Vol.*  
52 583 1989;12(4):299–306.
- 53  
54 584 [54] Chen L, Wang W, Du X, et al. Effectiveness of a smart phone app on improving immunization

- 1  
2 585 of children in rural Sichuan Province, China: study protocol for a paired cluster randomized  
3 586 controlled trial. *BMC Public Health* 2014;14(1):262.
- 4  
5  
6 587 [55] Mukumbang FC, Van Belle S, Marchal B, et al. Realist evaluation of the antiretroviral  
7 588 treatment adherence club programme in selected primary healthcare facilities in the  
8 589 metropolitan area of Western Cape Province, South Africa: a study protocol. *BMJ Open* 2017  
9 590 Jul 21];6(4):e009977-88.
- 10  
11  
12 591 [56] Pashanth N. et al. How does capacity building of health managers work? A realist evaluation  
13 592 study protocol. *BMJ* 2012;2(2):e000882.
- 14  
15  
16 593

17  
18  
19  
20  
21  
22  
23  
24  
25  
26  
27  
28  
29  
30  
31  
32  
33  
34  
35  
36  
37  
38  
39  
40  
41  
42  
43  
44  
45  
46  
47  
48  
49  
50  
51  
52  
53  
54  
55  
56  
57  
58  
59  
60

For peer review only

1  
2  
3  
4  
5  
6  
7  
8  
9  
10  
11  
12  
13  
14  
15  
16  
17  
18  
19  
20  
21  
22  
23  
24  
25  
26  
27  
28  
29  
30  
31  
32  
33  
34  
35  
36  
37  
38  
39  
40  
41  
42  
43  
44  
45  
46  
47  
48  
49  
50  
51  
52  
53  
54  
55  
56  
57  
58  
59  
60



Figure 1: Map of South Africa and study settings

194x145mm (96 x 96 DPI)

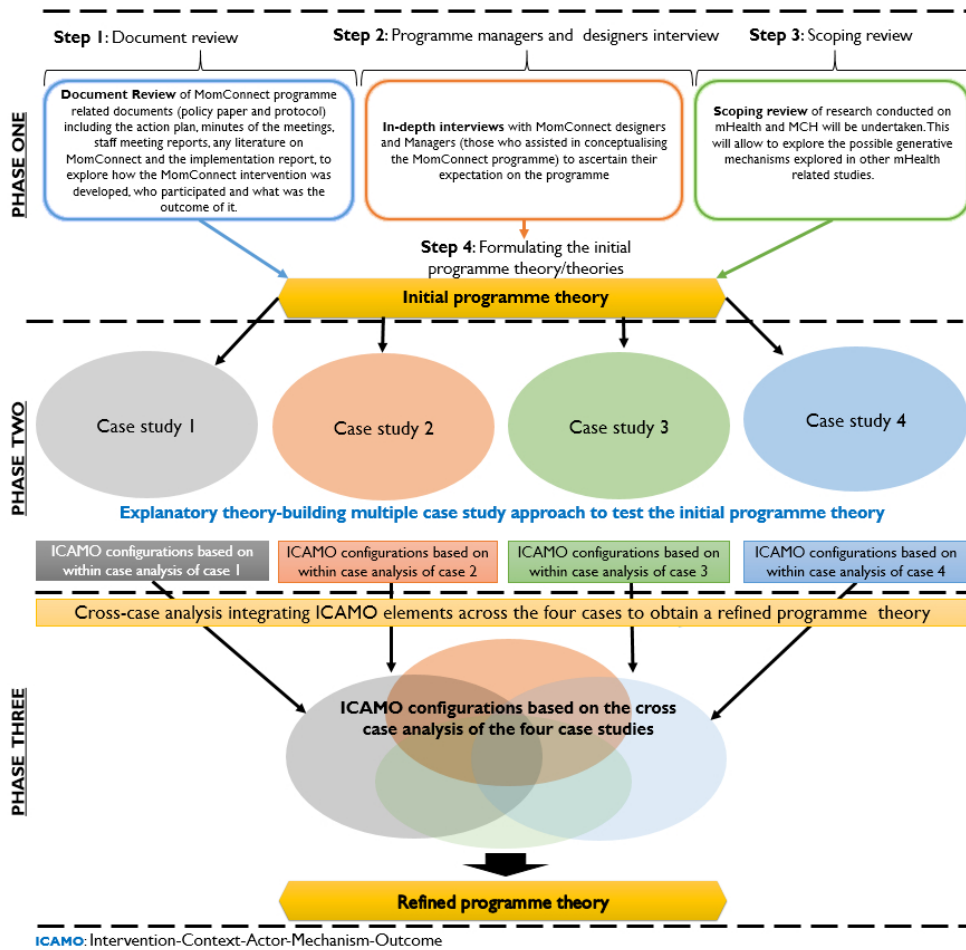

Figure 2: Study design showing Phases 1 to 3

237x225mm (96 x 96 DPI)

**Additional File 1 – Data collection form/Survey questionnaire**

This form will be presented to the respondents. The investigator will ask the participant each question and select the appropriate answer for each question.

| 1. Socio- demographics characteristics |                                                                                                     |
|----------------------------------------|-----------------------------------------------------------------------------------------------------|
| 1.1 Month & Year of birth              | ---                                                                                                 |
| 1.2 Age                                | ---                                                                                                 |
| 1.3 Race                               | White/Colored/Indian/Black/ Other...                                                                |
| 1.4 Marital status                     | Single / married / living together / divorced / separated / widowed                                 |
| 1.5 Highest level of schooling         | Less than primary / primary / secondary / diploma / degree                                          |
| 1.6 Partner level of education         | Less than primary / primary / secondary / diploma / degree                                          |
| 1.7 Occupation                         | Unemployed/Employed/student/refuse to answer                                                        |
| 1.8 Partner Occupation                 | Unemployed/Employed/student/refuse to answer                                                        |
| 1.9 What is your source of income?     | Permanent Employment / Part-time Employment / Seasonal Employment / Grant / Other (please specify). |
| 1.10 Parity                            | Primiparous/Multiparous                                                                             |
| 1.11 Wanted last child                 | Last child wanted, wanted child but later, wanted no more child                                     |
| 1.12 How many children do you have?    | (indicate numerical value) or Refuse to answer                                                      |
| 1.13 What is your home languishing?    | English/seseko/ Afrikance, sewana Xhosa, other                                                      |

| 2. Mobile phone usage for MomConnect                                                                                                   |                                                                                                                                        |
|----------------------------------------------------------------------------------------------------------------------------------------|----------------------------------------------------------------------------------------------------------------------------------------|
| <b>2.1 Mobile phone usage</b>                                                                                                          |                                                                                                                                        |
| 2.1.1 Do you have your own cellphone or do you use a SIM card in someone else's phone?<br>(If not, do you have access to a cellphone?) | Own phone/Only SIM card/No phone<br><br>Yes / No/DK/RA                                                                                 |
| 2.1.2 Do you share your cellphone?<br>(If yes, with whom do you share your phone?)                                                     | Yes / No<br>Partner / Family Member / Friend / Other                                                                                   |
| 2.1.3 Do you have problems in receiving messages in your phone?                                                                        | Yes/ No/ DK/RA                                                                                                                         |
| 2.1.4 What do you like the most about the MomConnect information received in your phone                                                | 1.The reminders about ANC and PNC booking/ 2 information about the development of my baby/ 3. Information about danger signs/ 4. Other |



| <b>3 Health seeking behaviours</b>                                                                            |                                                                                                                                                                                                                                                                            |                              |
|---------------------------------------------------------------------------------------------------------------|----------------------------------------------------------------------------------------------------------------------------------------------------------------------------------------------------------------------------------------------------------------------------|------------------------------|
| <b>3.1.1</b> Did you receive health check-ups (ANC) during your last pregnancy at least once?                 | 1. Yes /2 No                                                                                                                                                                                                                                                               | If no go to question 3.1.3   |
| <b>3.1.1.a.</b> If yes when was your first ANC visit?                                                         | 1. within 1 to 3 months/ 2. 4-6 months / 3. 7-9 months                                                                                                                                                                                                                     | If 2 or 3 ask question 3.1.3 |
| <b>3.1.1.b.</b> How many times did you visit for ANC during pregnancy?                                        | 1. 4 times/ 2. more                                                                                                                                                                                                                                                        |                              |
| <b>3.1.2</b> Why did you visit the clinic today?                                                              | 1. Pregnancy visit /2. 6-week post birth follows up / 3. Immunization /4. I am sick/ /5. Advised by my family members/6. To start a regular check- up/ 7. Other....                                                                                                        |                              |
| <b>3.1.3</b> Why didn't you attend ANC check-up during your three first months of pregnancy?                  | 1. I was healthy/2. I thought it was unnecessary/3. Expenses of Check-up was unaffordable/ 4. Clinic is too far away from home/5. Family members disapproved/6. Poor transportation facility to the health facility/7. I was scared/8. If any other reason, please specify |                              |
| <b>3.2.5</b> Did you go for PNC check-up after delivery?                                                      | 1. Yes/2. No                                                                                                                                                                                                                                                               |                              |
| <b>3.2.5.a</b> If yes When did you receive your PNC check-up and that of your baby?                           | 1. Within 6 days, 2. After 6 days                                                                                                                                                                                                                                          |                              |
| <b>3.2.5. b.</b> If after 6 days why?                                                                         | 1. I was healthy/2. I thought it was unnecessary/ 3. Expenses of health care/ 4. Clinic is too far away from home/ 5. Family members disapproved/5. Poor transportation facility to the health facility/6. I was scared/7. If any other reason, please specify             |                              |
| <b>3.1.6.</b> Why did you come to this health institution for check-up?<br>(more than 1 answer can be marked) | 1. Close to my house/ 2. Close to where I work /3. Inexpensive/4. Behaviour of staff is good/5. Convenient timing/ 6. Good quality service/Others...                                                                                                                       |                              |
| <b>3.1.7</b> How long do you have to travel to the nearest clinic                                             | 1. 1 to 2 km to / 2. 3 to 4 km/ 3>4 km                                                                                                                                                                                                                                     |                              |
| <b>3.2 Cultural belief (Please provide your answer to the following statement by selecting one answer)</b>    |                                                                                                                                                                                                                                                                            |                              |
| <b>3.2.2.</b> Do you need to ask a permission to go to the clinic for your ANC/PNC?                           | 1. Yes/ 2. No                                                                                                                                                                                                                                                              |                              |
| <b>3.2.3</b> To whom do you ask that permission for going to the clinic for ANC/PNC?                          | 1. My husband/ 2. Family/3. My mother in law/4. My own decision/5. others...                                                                                                                                                                                               |                              |
| <b>3.2.3</b> Who is looking after your children if you have to go to the clinic                               | 1. Grandparent/ 2 Husband/ 3. Friends/ 4. No one                                                                                                                                                                                                                           |                              |

**Thank you for your cooperation!**

1  
2  
3  
4  
5  
6  
7  
8 **Additional File 2 - Facility Assessment**  
9

| 2 Facility assessment (manager interview)                                                                               |                               |
|-------------------------------------------------------------------------------------------------------------------------|-------------------------------|
| 2.1. Do your clients access the facility easily?<br>why?                                                                | Yes/ No / Don't know / If not |
| 2.2. a. If no what are the possible barriers you may think of? .....                                                    |                               |
| 2.1 Do you train all your clients on how to use MomConnect?                                                             | Yes / No / Don't Know         |
| 2.1.a. If yes is this training continually?                                                                             | Yes / No / Don't Know         |
| 2.2. How many days do you have ANC per week?<br>week                                                                    | Once a week / Twice a         |
| 2.3. How many days do you provide PNC per week?                                                                         | One day / Two days            |
| 2.4. Is MomConnect programme education or training being given in each of your ANC and PNC session?<br>No / If no, why? | Yes/                          |
| 2.5. Are you using the MomConnect materiel during all your ANC session?                                                 | Yes / No / If no, why?        |
| 2.6. Do you use the MomConnect during your PNC session?                                                                 | Yes / No / If no, why?        |
|                                                                                                                         |                               |

39  
40 **THANK YOU FOR YOUR COOPERATION!**  
41  
42  
43  
44  
45  
46  
47  
48  
49  
50  
51  
52  
53  
54  
55  
56  
57  
58  
59  
60

### Additional File 3

#### Interview and Discussion Topic Guides for MomConnect key informants

My name is Eveline Kabongo. I'm from Stellenbosch University. My study is part of the MomConnect programme which you have designed. To begin I would like to thank you for your time and for being interviewed.

**Question 1:** I am interested in understanding how the MomConnect program works? The first thing that I want to know is what you see as the purpose of the MomConnect programme?

**Question 2:** Why did you think the MomConnect intervention is important to improve MCH health?

**Question 3:** What does the intervention consist of or what are the various components of the MomConnect programme?

**Question 4:** How did you expect the MomConnect programme to increase the utilisation of MCH care services such as ANC and PNC services?

**Question 5:** Who are the individuals involved in running the MomConnect programme?

**Question 6:** As a MomConnect designer and manager, how do you expect the MomConnect programme to improve ANC and PNC services in rural and urban areas? How do you think the messages that are sent to expectant mothers may improve ANC/PNC? Are there some of the enablers you can think of, i.e. things that can help the program succeed?

**Question 7:** During your planning what were the factors that you thought could act as barriers to the implementation of the MomConnect programme?

- a. Do you think that the user's level of education may have an impact on their use of MCH services? Do you think that users from poor households will have difficulty in using healthcare services even though they receive all the supporting messages encouraging them to go to the clinic and use health facilities through the MomConnect programme?

1  
2  
3  
4  
5  
6  
7  
8  
9  
10  
11  
12  
13  
14  
15  
16  
17  
18  
19  
20  
21  
22  
23  
24  
25  
26  
27  
28  
29  
30  
31  
32  
33  
34  
35  
36  
37  
38  
39  
40  
41  
42  
43  
44  
45  
46  
47  
48  
49  
50  
51  
52  
53  
54  
55  
56  
57  
58  
59  
60

**Question 8:** Which other conditions do you think could prohibit women from using ANC and PNC services?

**Thank you for your time and contribution!**

For peer review only

#### **Additional File 4 - Interview and Discussion Topic Guide for Healthcare Providers**

My name is Eveline Kabongo. I am from Stellenbosch University. As a healthcare provider, you are a target in this study as you are one of those who are implementing the MomConnect programme at the facility level.

**Question 1:** What is the purpose of the MomConnect programme?

**Question 2:** In your opinion how well do you think this programme is working? Is it achieving its goals or not? If not why?

**Question 3:** What exactly is it about MomConnect that makes ANC/PNC client use MCH services?

**Question 4:** Have you experienced for yourself that sending clients the messages on their mobile phone helps them to use MCH services? How exactly do you think this helps them?

**Question 5:** Why else do you think that pregnant women and mothers registered on MomConnect will use the MCH services as instructed by the messages and continue with their clinic appointments?

**Question 6:** In what ways do you think these clients become empowered to self-manage their uptake of MCH through the MomConnect messages?

**Question 7:** How were your services before the development of the MomConnect programme? Do you think it affects the way your services are being run?

**Thank you for your time and contribution**

1  
2  
3  
4 **Additional File 5 - Focus group discussion guideline with pregnant women and mothers of**  
5 **infants registered to MomConnect**  
6  
7

8 I am Ms Eveline Kabongo. I am from Stellenbosch University. My study seeks to examine how the  
9 MomConnect programme influences health-seeking behaviour among pregnant women and  
10 mothers of infants aged from zero to one year, to improve maternal and child health. Your  
11 collaboration will be of much help as it will allow us to understand the rationale behind the  
12 MomConnect programme.  
13  
14  
15  
16

17  
18 **Question 1:**How long have you been registered with the MomConnect programme? Does it help  
19 you better use your MCH and attend your clinic appointments?  
20  
21

22  
23 Do you think that being registered on the MomConnect programme makes your utilisation of  
24 ANC/or PNC a) Easy? b) Difficult? c) Did not change anything at all?  
25  
26  
27

28 **Question 2:** When receiving the message from MomConnect how do you feel?  
29

30 In what ways do you think that being registered on the MomConnect programme helps you to  
31 use ANC/PNC services and attend your clinic appointments?  
32  
33  
34

35  
36 **Question 3:** How does being registered to the MomConnect programme influence your  
37 healthcare service utilisation in terms of empowering or encouraging you to use ANC and PNC  
38 services as early as possible?  
39  
40  
41

42 **Question 4:** What makes you use ANC/PNC at the time that you are supposed to use it? What  
43 affects your use of ANC and PNC services as an individual?  
44  
45

46 **Question 5:** Do you give feedback about the message and services received? How does  
47 interaction and feedback help you to use ANC/PNC services?  
48  
49  
50

51 **Question 6:** What do you think about the messages and education that you receive from  
52 MomConnect? Does it really help you to use ANC/PNC services? If so, how?  
53  
54  
55  
56  
57  
58  
59  
60

1  
2  
3 **Question 7:** Did your husband or family member accept your use of ANC/PNC when needed?  
4  
5

6  
7 **Thank you for your time and contribution!**  
8  
9

10  
11  
12  
13  
14  
15  
16  
17  
18  
19  
20  
21  
22  
23  
24  
25  
26  
27  
28  
29  
30  
31  
32  
33  
34  
35  
36  
37  
38  
39  
40  
41  
42  
43  
44  
45  
46  
47  
48  
49  
50  
51  
52  
53  
54  
55  
56  
57  
58  
59  
60

For peer review only
