# Supplementary material for: Understanding the influence of the MomConnect programme on antenatal and postnatal care service utilisation in two South African provinces: a realist evaluation protocol
Source: PubMed Central journal article supplement — BMJ Open. 2019 Jul 1;9(7):e029745. doi: 10.1136/bmjopen-2019-029745 (PMC6609052; doi:10.1136/bmjopen-2019-029745), 2019-07-01
Supplement: bmjopen-2019-029745supp001.pdf [file bmjopen-2019-029745supp001.pdf]

### Additional File 1 – Data collection form/Survey questionnaire

This form will be presented to the respondents. The investigator will ask the participant each question and select the appropriate answer for each question.

| 1. Socio- demographics characteristics |                                                                                                     |
|----------------------------------------|-----------------------------------------------------------------------------------------------------|
| 1.1 Month & Year of birth              | ---                                                                                                 |
| 1.2 Age                                | ---                                                                                                 |
| 1.3 Race                               | White/Colored/Indian/Black/ Other...                                                                |
| 1.4 Marital status                     | Single / married / living together / divorced / separated / widowed                                 |
| 1.5 Highest level of schooling         | Less than primary / primary / secondary / diploma / degree                                          |
| 1.6 Partner level of education         | Less than primary / primary / secondary / diploma / degree                                          |
| 1.7 Occupation                         | Unemployed/Employed/student/refuse to answer                                                        |
| 1.8 Partner Occupation                 | Unemployed/Employed/student/refuse to answer                                                        |
| 1.9 What is your source of income?     | Permanent Employment / Part-time Employment / Seasonal Employment / Grant / Other (please specify). |
| 1.10 Parity                            | Primiparous/Multiparous                                                                             |
| 1.11 Wanted last child                 | Last child wanted, wanted child but later, wanted no more child                                     |
| 1.12 How many children do you have?    | (indicate numerical value) or Refuse to answer                                                      |
| 1.13 What is your home languishing?    | English/seseko/ Afrikance, sewana Xhosa, other                                                      |

| 2. Mobile phone usage for MomConnect                                                                                                          |                                                                                                                                        |
|-----------------------------------------------------------------------------------------------------------------------------------------------|----------------------------------------------------------------------------------------------------------------------------------------|
| <b>2.1 Mobile phone usage</b>                                                                                                                 |                                                                                                                                        |
| 2.1.1 Do you have your own cellphone or do you use a SIM card in someone else's phone?<br><i>(If not, do you have access to a cellphone?)</i> | Own phone/Only SIM card/No phone<br><br>Yes / No/DK/RA                                                                                 |
| 2.1.2 Do you share your cellphone?<br><i>(If yes, with whom do you share your phone?)</i>                                                     | Yes / No<br>Partner / Family Member / Friend / Other                                                                                   |
| 2.1.3 Do you have problems in receiving messages in your phone?                                                                               | Yes/ No/ DK/RA                                                                                                                         |
| 2.1.4 What do you like the most about the MomConnect information received in your phone                                                       | 1.The reminders about ANC and PNC booking/ 2 information about the development of my baby/ 3. Information about danger signs/ 4. Other |

| <b>3 Health seeking behaviours</b>                                                                            |                                                                                                                                                                                                                                                                            |                              |
|---------------------------------------------------------------------------------------------------------------|----------------------------------------------------------------------------------------------------------------------------------------------------------------------------------------------------------------------------------------------------------------------------|------------------------------|
| <b>3.1.1</b> Did you receive health check-ups (ANC) during your last pregnancy at least once?                 | 1. Yes /2 No                                                                                                                                                                                                                                                               | If no go to question 3.1.3   |
| <b>3.1.1.a.</b> If yes when was your first ANC visit?                                                         | 1. within 1 to 3 months/ 2. 4-6 months / 3. 7-9 months                                                                                                                                                                                                                     | If 2 or 3 ask question 3.1.3 |
| <b>3.1.1.b.</b> How many times did you visit for ANC during pregnancy?                                        | 1. 4 times/ 2. more                                                                                                                                                                                                                                                        |                              |
| <b>3.1.2</b> Why did you visit the clinic today?                                                              | 1. Pregnancy visit /2. 6-week post birth follows up / 3. Immunization /4. I am sick/ /5. Advised by my family members/6. To start a regular check- up/ 7. Other....                                                                                                        |                              |
| <b>3.1.3</b> Why didn't you attend ANC check-up during your three first months of pregnancy?                  | 1. I was healthy/2. I thought it was unnecessary/3. Expenses of Check-up was unaffordable/ 4. Clinic is too far away from home/5. Family members disapproved/6. Poor transportation facility to the health facility/7. I was scared/8. If any other reason, please specify |                              |
| <b>3.2.5</b> Did you go for PNC check-up after delivery?                                                      | 1. Yes/2. No                                                                                                                                                                                                                                                               |                              |
| <b>3.2.5.a</b> If yes When did you receive your PNC check-up and that of your baby?                           | 1. Within 6 days, 2. After 6 days                                                                                                                                                                                                                                          |                              |
| <b>3.2.5. b.</b> If after 6 days why?                                                                         | 1. I was healthy/2. I thought it was unnecessary/ 3. Expenses of health care/ 4. Clinic is too far away from home/ 5. Family members disapproved/5. Poor transportation facility to the health facility/6. I was scared/7. If any other reason, please specify             |                              |
| <b>3.1.6.</b> Why did you come to this health institution for check-up?<br>(more than 1 answer can be marked) | 1. Close to my house/ 2. Close to where I work /3. Inexpensive/4. Behaviour of staff is good/5. Convenient timing/ 6. Good quality service/Others...                                                                                                                       |                              |
| <b>3.1.7</b> How long do you have to travel to the nearest clinic                                             | 1. 1 to 2 km to / 2. 3 to 4 km/ 3>4 km                                                                                                                                                                                                                                     |                              |
| <b>3.2 Cultural belief (Please provide your answer to the following statement by selecting one answer)</b>    |                                                                                                                                                                                                                                                                            |                              |
| <b>3.2.2.</b> Do you need to ask a permission to go the clinic for your ANC/PNC?                              | 1. Yes/ 2. No                                                                                                                                                                                                                                                              |                              |
| <b>3.2.3</b> To whom do you ask that permission for going to the clinic for ANC/PNC?                          | 1. My husband/ 2. Family/3. My mother in law/4. My own decision/5. others...                                                                                                                                                                                               |                              |
| <b>3.2.3</b> Who is looking after your children if you have to go to the clinic                               | 1. Grandparent/ 2 Husband/ 3. Friends/ 4. No one                                                                                                                                                                                                                           |                              |

**Thank you for your cooperation!**
