# Supplementary material for: Understanding the influence of the MomConnect programme on antenatal and postnatal care service utilisation in two South African provinces: a realist evaluation protocol
Source: PubMed Central journal article supplement — BMJ Open. 2019 Jul 1;9(7):e029745. doi: 10.1136/bmjopen-2019-029745 (PMC6609052; doi:10.1136/bmjopen-2019-029745), 2019-07-01
Supplement: bmjopen-2019-029745supp002.pdf [file bmjopen-2019-029745supp002.pdf]

## Additional File 2 - Facility Assessment

| 2 Facility assessment (manager interview)                                                                                 |                               |
|---------------------------------------------------------------------------------------------------------------------------|-------------------------------|
| 2.1. Do your clients access the facility easily?<br><br>why?                                                              | Yes/ No / Don't know / If not |
| 2.2. a. If no what are the possible barriers you may think of? .....                                                      |                               |
| 2.1 Do you train all your clients on how to use MomConnect?                                                               | Yes / No / Don't Know         |
| 2.1.a. If yes is this training continually?                                                                               | Yes / No / Don't Know         |
| 2.2. How many days do you have ANC per week?<br>week                                                                      | Once a week / Twice a week    |
| 2.3. How many days do you provide PNC per week?                                                                           | One day / Two days            |
| 2.4. Is MomConnect programme education or training being given in each of your ANC and PNC session? Yes/ No / If no, why? |                               |
| 2.5. Are you using the MomConnect materiel during all your ANC session? Yes / No / If no, why?                            |                               |
| 2.6. Do you use the MomConnect during your PNC session? Yes / No / If no, why?                                            |                               |
|                                                                                                                           |                               |

**THANK YOU FOR YOUR COOPERATION!**
