# Supplementary material for: Understanding the influence of the MomConnect programme on antenatal and postnatal care service utilisation in two South African provinces: a realist evaluation protocol
Source: PubMed Central journal article supplement — BMJ Open. 2019 Jul 1;9(7):e029745. doi: 10.1136/bmjopen-2019-029745 (PMC6609052; doi:10.1136/bmjopen-2019-029745), 2019-07-01
Supplement: bmjopen-2019-029745supp004.pdf [file bmjopen-2019-029745supp004.pdf]

#### **Additional File 4 - Interview and Discussion Topic Guide for Healthcare Providers**

My name is Eveline Kabongo. I am from Stellenbosch University. As a healthcare provider, you are a target in this study as you are one of those who are implementing the MomConnect programme at the facility level.

**Question 1:** What is the purpose of the MomConnect programme?

**Question 2:** In your opinion how well do you think this programme is working? Is it achieving its goals or not? If not why?

**Question 3:** What exactly is it about MomConnect that makes ANC/PNC client use MCH services?

**Question 4:** Have you experienced for yourself that sending clients the messages on their mobile phone helps them to use MCH services? How exactly do you think this helps them?

**Question 5:** Why else do you think that pregnant women and mothers registered on MomConnect will use the MCH services as instructed by the messages and continue with their clinic appointments?

**Question 6:** In what ways do you think these clients become empowered to self-manage their uptake of MCH through the MomConnect messages?

**Question 7:** How were your services before the development of the MomConnect programme? Do you think it affects the way your services are being run?

**Thank you for your time and contribution**
